# Supplementary material for: Impaired renal transporter gene expression and uremic toxin excretion as aging hallmarks in cats with naturally occurring chronic kidney disease
Source: publisher site journal article supplement (doi:10.18632/aging.206176), 2024-12-20
Supplement: Supplementary file [file aging-v16-206176-supplementary-material-SD1.pdf]

## SUPPLEMENTARY METHODS

### Targeted metabolomics assay by HPLC-MS/MS

Forty microliters (40  $\mu$ L) of serum were mixed with 10  $\mu$ L of internal standard and 200  $\mu$ L of cold methanol. The mixture was vortexed for 5 seconds and then incubated at  $-20^{\circ}$  C overnight, followed by centrifugation at 15000 g and  $4^{\circ}$  C for 15 minutes. One-hundred 100  $\mu$ L supernatant was recovered and mixed with 900  $\mu$ L of 50% methanol, which was stored at  $-20^{\circ}$  C until analysis. Twenty microliters (20  $\mu$ L) of urine sample were mixed with 80  $\mu$ L of cold methanol, and then incubated at  $-20^{\circ}$  C overnight, followed by centrifugation at 15000 g and  $4^{\circ}$  C for 15 min. The supernatant (10  $\mu$ L) was recovered and then added with 10  $\mu$ L of internal standard and 1 mL of 50% methanol, which were then stored at  $-20^{\circ}$  C until analysis. The internal standard included 12.5  $\mu$ g/mL of TMAO-D9, 250  $\mu$ g/mL of PCS-D7, 12  $\mu$ g/mL of IxS-D5, and 1  $\mu$ g/mL of IAA-D5 dissolved in 50% methanol in water. Details of the assay can be found in the Supplemental Methods. Serum concentrations of metabolites are reported as  $\mu$ g/mL.

The authentic standards PCS was purchased from APEXBio Technology, IS and IS-D5 from Cayman Chemical, TMAO, IAA and IPA from Sigma-Aldrich, TMAO-D9 from Santa Cruz Biotechnology, PCS-D7 from Cambridge Isotope, IAA-D5 from CDN Isotope, PS from TCI Chemicals. Uremic toxin internal standard mix contained 12.5  $\mu$ g/mL of TMAO-D9, 250  $\mu$ g/mL of pCS-D7, 12  $\mu$ g/mL of IDS-D5, and 1  $\mu$ g/mL of IAA-D5 dissolved in 50% methanol in water.

The serum sample (40  $\mu$ L) was mixed with 10  $\mu$ L of internal standard and 200  $\mu$ L of cold methanol. The mixture was vortexed for 5 s and then incubated at  $-20^{\circ}$  C overnight, followed by centrifugation at 15000 g and  $4^{\circ}$  C for 15 min. The supernatant (100  $\mu$ L) was recovered and then added with 900  $\mu$ L of 50% methanol, which were then stored at  $-20^{\circ}$  C until analysis. A small aliquot of sample extract was pooled from each sample to generate a quality control (QC) sample.

UPLC-MS/MS was performed on a Waters Acquity UPLC coupled to a Waters Xevo TQ-S triple quadrupole mass spectrometer. Chromatographic separations were carried out on a Waters UPLC T3 stationary phase (2.1 x 50 mm, 1.8  $\mu$ M) column. Mobile phases were water with 0.1% formic acid (A)

and acetonitrile with 0.1% formic acid (B). The analytical gradient was as follows: time = 0 min, 1% B; time = 0.65 min, 1% B; time = 2.85 min, 99% B; time = 3.5 min, 99% B; time = 3.55 min, 1% B; time = 5 min, 1% B. Flow rate was 500  $\mu$ L/min. Samples were held at  $6^{\circ}$  C in the autosampler, and the column was operated at  $45^{\circ}$  C. Injection volume was 2  $\mu$ L. The capillary voltage of MS detector was set to 0.7 kV MS in both positive and negative mode during polarity switching. Inter-channel delay was set to 3 msec. Source temperature was  $150^{\circ}$  C and desolvation temperature  $550^{\circ}$  C. Desolvation gas flow was 1000 L/hr, cone gas flow (nitrogen) was 150 L/hr, and collision gas flow (argon) was 0.15 mL/min. Nebulizers pressure (nitrogen) was set to 7 Bar. Autodwell feature was set for the collection of 12 points-across-peak. Cone voltage and collision energy of each MRM was manually optimized.

### Renal tissue gene expression assay by RT-qPCR

RNA was isolated from snap frozen kidney cortex and medulla. cDNA was reverse-transcribed from 250 ng of RNA using the High-Capacity cDNA Reverse Transcription Kit (Thermo Fisher Scientific) following manufacturer's instructions, and undiluted cDNAs were used to perform quantitative RT-PCR on a LightCycler@ 480 (Roche) using SYBR Green PCR Master Mix (Roche). The pre-incubation phase was performed at  $95^{\circ}$  C for 7 min and cDNAs were then amplified over 45 cycles at  $95^{\circ}$  C for 15 s and  $63^{\circ}$  C for 1 min. To quantify mRNA expression,  $2^{-\Delta\Delta C_t}$  calculation was used to express results relative to HPRT and RPL17 expression as these reference genes were previously selected based on their stability across specific cat tissue (Penning et al; 2007). The following primer sequences were used:

HPRT

Forward: 5'- ACTGTAATGACCAGTCAACAGGGG-3'

Reverse: 5'- TGTATCCAACACTTCGAGGAGTCC-3'

RPL17

Forward: 5'- CTCTGGTCATTGAGCACATCC-3'

Reverse: 5'- TCAATGTGGCAGGGAGAGC-3'

OAT1

Forward: 5'- GGGTGATACCCAGGATCAGT-3'

Reverse: 5'- CAGTTGAAGGAGGTAGCCAGG-3'

OAT3

Forward: 5'-AAACCATCTGGGCCAACACA

Reverse: 5'-GGTCTGCGAATCCGAGGG

OATP4C1

Forward: 5'-GGAGGAGTGAGTGGGAGAGT -3'

Reverse: 5'-GCCATTTACTACAATACCTTCTGC-3'
