# Supplementary material for: Impaired renal transporter gene expression and uremic toxin excretion as aging hallmarks in cats with naturally occurring chronic kidney disease
Source: publisher site journal article supplement (doi:10.18632/aging.206176), 2024-12-20
Supplement: Supplementary file [file aging-v16-206176-supplementary-material-SD3.pdf]

## SUPPLEMENTARY TABLE

Supplementary Table 1. Serum concentrations of metabolites in cohort 1.

|      | <b>Mann whitney</b> | <b>Mean</b>        |                     | <b>SEM</b>    |                | <b>Fold change</b> |
|------|---------------------|--------------------|---------------------|---------------|----------------|--------------------|
|      | <b>P_MW</b>         | <b>CON (ug/mL)</b> | <b>CKD2 (ug/mL)</b> | <b>SE_CON</b> | <b>SE_CKD2</b> | <b>FC_CKD2vCON</b> |
| TMAO | 0.00006             | 0.66               | 2.89                | 0.1           | 0.66           | 4.38               |
| IxS  | 0.00067             | 1.19               | 4.79                | 0.25          | 1.19           | 4.03               |
| PCS  | 0.00917             | 3.24               | 10.95               | 0.54          | 2.91           | 3.38               |
| PS   | 0.00757             | 0.3                | 3                   | 0.05          | 1.3            | 10                 |
| IAA  | 0.17651             | 0.49               | 0.59                | 0.12          | 0.14           | 1.2                |
| IPA  | 0.27233             | 0.25               | 0.18                | 0.03          | 0.03           | 0.72               |
