# Supplementary material for: Impaired renal transporter gene expression and uremic toxin excretion as aging hallmarks in cats with naturally occurring chronic kidney disease
Source: publisher site journal article supplement (doi:10.18632/aging.206176), 2024-12-20
Supplement: Supplementary file [file aging-v16-206176-supplementary-material-SD5.pdf]

**Supplementary Table 3. Urine metabolites in cohort 1.**

|      | P_MW    | Index to creatinine |           |         |          |             | Absolute concentration (ug/mL) |           |
|------|---------|---------------------|-----------|---------|----------|-------------|--------------------------------|-----------|
|      |         | Mean_CON            | Mean_CKD2 | SEM_CON | SEM_CKD2 | FC_CKD2_CON | Mean_CON                       | Mean_CKD2 |
| TMAO | 0.00499 | 0.45                | 1.2       | 0.07    | 0.27     | 2.67        | 134.46                         | 102.29    |
| IxS  | 0.03377 | 0.69                | 1.5       | 0.12    | 0.31     | 2.17        | 199.81                         | 150.46    |
| PCS  | 0.03582 | 0.81                | 2.17      | 0.12    | 0.72     | 2.68        | 238.72                         | 181.7     |
| PS   | 0.16786 | 0.17                | 0.55      | 0.02    | 0.22     | 3.24        | 50                             | 71.22     |
| IAA  | 0.39102 | 0.02                | 0.01      | 0.01    | 0        | 0.5         | 6.62                           | 1.16      |
