# Supplementary material for: Impaired renal transporter gene expression and uremic toxin excretion as aging hallmarks in cats with naturally occurring chronic kidney disease
Source: publisher site journal article supplement (doi:10.18632/aging.206176), 2024-12-20
Supplement: Supplementary file [file aging-v16-206176-supplementary-material-SD9.pdf]

**Supplementary Table 7a. Renal cortical tissue samples.**

|           | <b>Control</b> | <b>CKD1/2</b> | <b>CKD3/4</b> | <b>Amyloid</b> | <b>P-value</b> |
|-----------|----------------|---------------|---------------|----------------|----------------|
| N = 24    | 6              | 8             | 7             | 3              |                |
| Age (yrs) | 13.7 + 1.04    | 14.2 + 0.91   | 12.8 + 1.11   | 14.6 + 0.57    | 0.92           |
| Sex (F/M) | 4/2            | 4/4           | 4/3           | 3/2            | 0.95           |

**Supplementary Table 7b. Renal medulla tissue samples.**

|           | <b>Control</b> | <b>CKD1/2</b> | <b>CKD3/4</b> | <b>Amyloid</b> | <b>P-value</b> |
|-----------|----------------|---------------|---------------|----------------|----------------|
| N = 21    | 6              | 7             | 5             | 3              |                |
| Age (yrs) | 13.7 + 1.16    | 13.8 + 1.09   | 12.2 + 1.29   | 13.3 + 0.66    | 0.95           |
| Sex (F/M) | 4/2            | 3/4           | 3/2           | 3/0            | 0.48           |
