# Supplementary material for: Impaired renal transporter gene expression and uremic toxin excretion as aging hallmarks in cats with naturally occurring chronic kidney disease
Source: Aging (Albany NY). 2024 Dec 20;16(22):13588–607. doi: 10.18632/aging.206176 (PMC11723653; doi:10.18632/aging.206176)
Supplement: Supplementary Table 2 [file aging-16-206176-s004.xlsx]

## Sheet: Table S2 serum c2
Supplementary Table 2. Serum concentrations of metabolites in cohort 2.
	Kruskal-Wallis	Dunn's multiple comparisons			Mean			SEM			Fold Change
	P_KW	P_CKD2_v_CON	P_CKD3_v_CON	P_CKD3_CKD2	CON (ug/mL)	CKD2 (ug/mL)	CKD3 (ug/mL)	SE_CON	SE_CKD2	SE_CKD3	FC_CKD2vCON	FC_CKD3vCON
TMAO	0.01671	0.03371	0.00241	0.16094	0.82	1.85	2.68	0.1	0.5	0.71	2.26	3.27
IxS	0.01671	0.03371	0.00241	0.16094	1.94	3.24	5.26	0.39	0.59	1.29	1.67	2.71
PCS	0.10268	0.38026	0.02378	0.04683	2.8	4.34	6.89	0.73	1.63	1.64	1.55	2.46
PS	0.10375	0.07745	0.01863	0.2545	1.78	2.2	6.99	1.4	0.99	5.78	1.24	3.93
IAA	0.03691	0.12132	0.00515	0.08121	0.18	0.22	0.29	0.04	0.03	0.03	1.22	1.61
IPA	0.59452	0.20817	0.17366	0.44947	0.27	0.28	0.22	0.04	0.08	0.04	1.04	0.81
