# Supplementary material for: Impaired renal transporter gene expression and uremic toxin excretion as aging hallmarks in cats with naturally occurring chronic kidney disease
Source: Aging (Albany NY). 2024 Dec 20;16(22):13588–607. doi: 10.18632/aging.206176 (PMC11723653; doi:10.18632/aging.206176)
Supplement: Supplementary Table 4 [file aging-16-206176-s006.xlsx]

## Sheet: Table S4 urine c2
Supplementary Table 4. Urine metabolites in cohort 2.
	Index to creatinine							Absolute concentration (ug/mL)
	P_KW	P_CKD2_CON	P_CKD3_CON	P_CKD3_CKD2	Mean_CON	Mean_CKD2	Mean_CKD3	Mean_CON	Mean_CKD2	Mean_CKD3
TMAO	0.31756	0.28815	0.06699	0.17366	0.9	0.89	0.59	208.27	63.98	45.75
IxS	0.2842	0.06375	0.3516	0.12652	0.9	1.32	1.06	215.4	92.56	81.4
pCS	0.81768	0.43944	0.32376	0.27106	0.68	0.79	0.77	193.09	66.39	57.88
PS	0.73653	0.22303	0.29688	0.40959	0.29	0.42	0.8	58.46	27.2	51.4
IAA	0.05229	0.01041	0.03566	0.30573	0.02	0.01	0.01	4.09	0.57	0.72
