# Supplementary material for: Impaired renal transporter gene expression and uremic toxin excretion as aging hallmarks in cats with naturally occurring chronic kidney disease
Source: Aging (Albany NY). 2024 Dec 20;16(22):13588–607. doi: 10.18632/aging.206176 (PMC11723653; doi:10.18632/aging.206176)
Supplement: Supplementary Table 6 [file aging-16-206176-s008.xlsx]

## Sheet: Table S6
Supplementary Table 6. Bootstrap resampling experiment in cohort 1.
P_Age	P_Wgt	P_Sex	P_TMAO	P_IxS	P_PCS	P_PS	Q_TMAO	Q_IxS	Q_PCS	Q_PS
0.21691	0.00708	1	0.0004	0.0032	0.00755	0.00991	0.000690827	0.00405577	0.0243654	0.0243842
0.27688	0.00162	0.71361	0.0008	0.00284	0.01747	0.02235	0.0008	0.00395543	0.0243654	0.0252542
0.1907	0.01138	1	0.00053	0.00361	0.02972	0.01837	0.000690827	0.00424207	0.0306076	0.0245521
0.09352	0.008	0.72211	0.00035	0.00153	0.01288	0.01357	0.000690827	0.00395543	0.0243654	0.0243842
0.14541	0.00708	1	0.0007	0.00361	0.01427	0.0064	0.000761697	0.00424207	0.0243654	0.0243842
0.1669	0.008	1	0.00061	0.00284	0.0116	0.01837	0.000690827	0.00395543	0.0243654	0.0245521
0.1907	0.00708	1	0.0004	0.00197	0.01044	0.01223	0.000690827	0.00395543	0.0243654	0.0243842
0.13549	0.00427	1	0.0004	0.00119	0.02128	0.02461	0.000690827	0.00395543	0.0250943	0.0262927
0.09352	0.00374	1	9e-05	0.00053	0.01044	0.01837	0.000690827	0.00395543	0.0243654	0.0245521
0.17851	0.00327	1	0.00061	0.00511	0.01837	0.02235	0.000690827	0.00527348	0.0247119	0.0252542
0.07383	0.00249	1	0.00015	0.00104	0.0158	0.01503	0.000690827	0.00395543	0.0243654	0.0243842
0.17851	0.008	1	0.00046	0.00252	0.01427	0.01223	0.000690827	0.00395543	0.0243654	0.0243842
0.10096	0.00103	0.42514	0.0002	0.00104	0.00676	0.01503	0.000690827	0.00395543	0.0243654	0.0243842
0.23095	0.00327	1	0.00053	0.00223	0.01837	0.02028	0.000690827	0.00395543	0.0247119	0.0245521
0.10096	0.00901	1	0.00026	0.00252	0.00755	0.01101	0.000690827	0.00395543	0.0243654	0.0243842
0.26093	0.01426	0.48127	0.00061	0.0032	0.01663	0.0089	0.000690827	0.00405577	0.0243654	0.0243842
0.23095	0.00901	1	0.00053	0.00284	0.00842	0.01503	0.000690827	0.00395543	0.0243654	0.0243842
0.32868	0.01138	1	0.0008	0.00361	0.02972	0.01223	0.0008	0.00424207	0.0306076	0.0243842
0.1261	0.00139	1	0.00023	0.00174	0.0089	0.02028	0.000690827	0.00395543	0.0243654	0.0245521
0.13549	0.00486	0.72211	0.00061	0.00406	0.01663	0.01837	0.000690827	0.00448619	0.0243654	0.0245521
0.17851	0.00901	1	0.0007	0.00455	0.0054	0.00991	0.000761697	0.00485592	0.0243654	0.0243842
0.2035	0.00427	1	0.00046	0.00284	0.01101	0.01663	0.000690827	0.00395543	0.0243654	0.0243842
0.1669	0.00626	0.72211	0.00053	0.00197	0.03112	0.02235	0.000690827	0.00395543	0.0317227	0.0252542
0.1261	0.00901	0.72211	0.00061	0.00284	0.0054	0.00406	0.000690827	0.00395543	0.0243654	0.0243842
0.10096	0.00374	1	0.00017	0.00119	0.01427	0.00798	0.000690827	0.00395543	0.0243654	0.0243842
0.15588	0.00486	1	0.00031	0.00174	0.02235	0.01503	0.000690827	0.00395543	0.0258681	0.0243842
0.07998	0.00249	1	0.00013	0.00061	0.01044	0.01223	0.000690827	0.00395543	0.0243654	0.0243842
0.13549	0.00327	1	0.00031	0.00153	0.02128	0.02028	0.000690827	0.00395543	0.0250943	0.0245521
0.14541	0.00552	1	0.00061	0.00284	0.0258	0.02461	0.000690827	0.00395543	0.0277419	0.0262927
0.2035	0.00486	1	0.0007	0.00572	0.01357	0.01223	0.000761697	0.00579534	0.0243654	0.0243842
0.06807	0.00552	1	0.00011	0.0007	0.00938	0.01503	0.000690827	0.00395543	0.0243654	0.0243842
0.08654	0.008	1	0.00026	0.00104	0.01427	0.01101	0.000690827	0.00395543	0.0243654	0.0243842
0.1907	0.01138	0.72211	0.00061	0.00455	0.00938	0.00572	0.000690827	0.00485592	0.0243654	0.0243842
0.2035	0.01014	1	0.00046	0.00361	0.01663	0.01663	0.000690827	0.00424207	0.0243654	0.0243842
0.1261	0.00626	1	0.00061	0.00174	0.00755	0.01223	0.000690827	0.00395543	0.0243654	0.0243842
0.29349	0.00327	1	0.00053	0.00252	0.04272	0.01503	0.000690827	0.00395543	0.04272	0.0243842
0.26093	0.008	1	0.00046	0.00223	0.01427	0.01837	0.000690827	0.00395543	0.0243654	0.0245521
0.1669	0.00286	1	0.00046	0.00197	0.02128	0.01663	0.000690827	0.00395543	0.0250943	0.0243842
0.17851	0.00139	1	0.00061	0.00252	0.0193	0.01837	0.000690827	0.00395543	0.0247119	0.0245521
0.1907	0.00162	0.71361	0.00046	0.00197	0.00938	0.01101	0.000690827	0.00395543	0.0243654	0.0243842
0.05298	0.01014	0.72211	0.00046	0.00252	0.00755	0.00715	0.000690827	0.00395543	0.0243654	0.0243842
0.14541	0.00327	1	0.00053	0.00284	0.01837	0.01223	0.000690827	0.00395543	0.0247119	0.0243842
0.1261	0.01138	0.72211	0.00061	0.00361	0.01044	0.00798	0.000690827	0.00424207	0.0243654	0.0243842
0.13549	0.008	1	0.00046	0.00223	0.01663	0.02028	0.000690827	0.00395543	0.0243654	0.0245521
0.23095	0.00552	1	0.0008	0.00406	0.01427	0.00715	0.0008	0.00448619	0.0243654	0.0243842
0.11723	0.00427	1	0.00015	0.00061	0.02835	0.01837	0.000690827	0.00395543	0.0296548	0.0245521
0.17851	0.01591	1	0.0004	0.00153	0.03412	0.02028	0.000690827	0.00395543	0.0343952	0.0245521
0.1669	0.00286	1	0.00061	0.00284	0.01663	0.01503	0.000690827	0.00395543	0.0243654	0.0243842
0.1669	0.00046	0.42514	0.0002	0.00104	0.01503	0.02235	0.000690827	0.00395543	0.0243654	0.0252542
0.2035	0.00427	1	0.0007	0.0064	0.01663	0.01663	0.000761697	0.00640641	0.0243654	0.0243842
0.1907	0.00427	0.72211	0.00023	0.00252	0.01747	0.01223	0.000690827	0.00395543	0.0243654	0.0243842
0.27688	0.01014	1	0.00053	0.00361	0.01837	0.01223	0.000690827	0.00424207	0.0247119	0.0243842
0.31076	0.00327	1	0.00053	0.00361	0.01837	0.01837	0.000690827	0.00424207	0.0247119	0.0245521
0.09352	0.00626	0.72211	0.00046	0.0032	0.0116	0.01223	0.000690827	0.00405577	0.0243654	0.0243842
0.05298	0.00187	1	0.0002	0.0008	0.0158	0.00991	0.000690827	0.00395543	0.0243654	0.0243842
0.1907	0.00427	1	0.00046	0.00174	0.00605	0.01357	0.000690827	0.00395543	0.0243654	0.0243842
0.34726	0.01014	1	0.0008	0.00572	0.03412	0.00798	0.0008	0.00579534	0.0343952	0.0243842
0.23095	0.00901	1	0.00053	0.00284	0.02345	0.01837	0.000690827	0.00395543	0.0264374	0.0245521
0.24562	0.01138	1	0.0007	0.0064	0.00938	0.00798	0.000761697	0.00640641	0.0243654	0.0243842
0.29349	0.00486	1	0.0008	0.00455	0.0326	0.01837	0.0008	0.00485592	0.0330629	0.0245521
0.09352	0.01275	0.72211	0.00031	0.00135	0.02461	0.02028	0.000690827	0.00395543	0.0271334	0.0245521
0.21691	0.01591	0.72211	0.00053	0.00284	0.03412	0.02461	0.000690827	0.00395543	0.0343952	0.0262927
0.09352	0.00626	1	0.00035	0.00223	0.01288	0.01223	0.000690827	0.00395543	0.0243654	0.0243842
0.21691	0.00708	1	0.0004	0.00153	0.00755	0.01357	0.000690827	0.00395543	0.0243654	0.0243842
0.21691	0.0219	0.72211	0.00053	0.00406	0.01747	0.01663	0.000690827	0.00448619	0.0243654	0.0243842
0.07383	0.00286	1	0.00061	0.00252	0.00605	0.00991	0.000690827	0.00395543	0.0243654	0.0243842
0.08654	0.00249	1	0.00031	0.00197	0.01101	0.00572	0.000690827	0.00395543	0.0243654	0.0243842
0.26093	0.00139	1	0.00061	0.0032	0.01427	0.01503	0.000690827	0.00405577	0.0243654	0.0243842
0.14541	0.02427	0.48127	0.0004	0.00455	0.01044	0.00798	0.000690827	0.00485592	0.0243654	0.0243842
0.23095	0.00088	0.71361	0.00061	0.00252	0.0116	0.02706	0.000690827	0.00395543	0.0243654	0.0282759
0.24562	0.01138	0.48127	0.00046	0.00284	0.00842	0.01503	0.000690827	0.00395543	0.0243654	0.0243842
0.15588	0.00552	1	0.0007	0.00455	0.00938	0.00991	0.000761697	0.00485592	0.0243654	0.0243842
0.1669	0.00427	1	0.00046	0.00361	0.01357	0.02461	0.000690827	0.00424207	0.0243654	0.0262927
0.10885	0.00286	1	0.00031	0.00174	0.00676	0.01503	0.000690827	0.00395543	0.0243654	0.0243842
0.17851	0.00249	0.71361	0.00061	0.00252	0.01044	0.01101	0.000690827	0.00395543	0.0243654	0.0243842
0.13549	0.00374	1	0.00061	0.00406	0.01223	0.01663	0.000690827	0.00448619	0.0243654	0.0243842
0.2035	0.00708	1	0.00046	0.00119	0.01427	0.01223	0.000690827	0.00395543	0.0243654	0.0243842
0.10885	0.008	0.72211	0.0004	0.0032	0.02706	0.00715	0.000690827	0.00405577	0.0286047	0.0243842
0.08654	0.01138	1	0.00015	0.0007	0.00755	0.00991	0.000690827	0.00395543	0.0243654	0.0243842
0.14541	0.00374	1	0.00023	0.00174	0.02028	0.02028	0.000690827	0.00395543	0.0250943	0.0245521
0.2035	0.00249	1	0.00026	0.00135	0.01837	0.01663	0.000690827	0.00395543	0.0247119	0.0243842
0.1261	0.01591	0.72211	0.00046	0.00361	0.02128	0.00798	0.000690827	0.00424207	0.0250943	0.0243842
0.1907	0.00708	1	0.00035	0.00223	0.01044	0.01837	0.000690827	0.00395543	0.0243654	0.0245521
0.21691	0.00901	0.72211	0.00061	0.00361	0.01747	0.01223	0.000690827	0.00424207	0.0243654	0.0243842
0.13549	0.00249	1	0.00013	0.0007	0.0158	0.01837	0.000690827	0.00395543	0.0243654	0.0245521
0.05298	0.00486	1	0.00023	0.00061	0.01101	0.01503	0.000690827	0.00395543	0.0243654	0.0243842
0.2035	0.00901	1	0.00061	0.00361	0.03112	0.0326	0.000690827	0.00424207	0.0317227	0.0330629
0.26093	0.00427	0.71361	0.00046	0.00284	0.01837	0.02461	0.000690827	0.00395543	0.0247119	0.0262927
0.2035	0.01426	0.48127	0.00046	0.00252	0.0158	0.02028	0.000690827	0.00395543	0.0243654	0.0245521
0.23095	0.01275	0.72211	0.00053	0.00252	0.04085	0.01663	0.000690827	0.00395543	0.0408909	0.0243842
0.21691	0.01014	1	0.00061	0.00223	0.02835	0.02461	0.000690827	0.00395543	0.0296548	0.0262927
0.11723	0.00626	1	0.00035	0.00223	0.01427	0.00715	0.000690827	0.00395543	0.0243654	0.0243842
0.15588	0.00708	1	0.00035	0.00174	0.00842	0.01223	0.000690827	0.00395543	0.0243654	0.0243842
0.1669	0.00249	0.71361	0.00035	0.00197	0.02028	0.02972	0.000690827	0.00395543	0.0250943	0.0305133
0.14541	0.00286	1	0.00023	0.00119	0.0116	0.00991	0.000690827	0.00395543	0.0243654	0.0243842
0.1261	0.00552	1	0.00035	0.00174	0.01223	0.01663	0.000690827	0.00395543	0.0243654	0.0243842
0.10096	0.01591	0.72211	0.00053	0.00223	0.01427	0.00715	0.000690827	0.00395543	0.0243654	0.0243842
0.31076	0.01426	0.72211	0.0008	0.00361	0.02128	0.00798	0.0008	0.00424207	0.0250943	0.0243842
0.10096	0.008	1	0.0008	0.00406	0.01747	0.00991	0.0008	0.00448619	0.0243654	0.0243842
0.1669	0.00626	1	0.0004	0.00174	0.0258	0.01503	0.000690827	0.00395543	0.0277419	0.0243842
0.24562	0.01138	1	0.00061	0.00406	0.02128	0.01663	0.000690827	0.00448619	0.0250943	0.0243842
0.1669	0.00626	1	0.00046	0.00284	0.01101	0.02028	0.000690827	0.00395543	0.0243654	0.0245521
0.1261	0.00075	1	0.00023	0.00174	0.01223	0.01357	0.000690827	0.00395543	0.0243654	0.0243842
0.10885	0.00427	1	0.0004	0.00223	0.0193	0.01663	0.000690827	0.00395543	0.0247119	0.0243842
0.06807	0.00626	1	0.00015	0.00053	0.01427	0.01101	0.000690827	0.00395543	0.0243654	0.0243842
0.15588	0.008	1	0.00046	0.00361	0.00938	0.0064	0.000690827	0.00424207	0.0243654	0.0243842
0.26093	0.00708	0.48127	0.0004	0.00252	0.01427	0.02461	0.000690827	0.00395543	0.0243654	0.0262927
0.1907	0.00187	1	0.00053	0.0032	0.00991	0.01223	0.000690827	0.00405577	0.0243654	0.0243842
0.07998	0.00708	1	0.0002	0.00135	0.00482	0.01101	0.000690827	0.00395543	0.0243654	0.0243842
0.21691	0.00552	1	0.0008	0.00511	0.0158	0.00991	0.0008	0.00527348	0.0243654	0.0243842
0.2035	0.01138	0.72211	0.00046	0.00174	0.0193	0.0089	0.000690827	0.00395543	0.0247119	0.0243842
0.08654	0.00427	1	0.00026	0.00135	0.00842	0.01663	0.000690827	0.00395543	0.0243654	0.0243842
0.09352	0.00901	0.48127	0.00023	0.00119	0.00842	0.0089	0.000690827	0.00395543	0.0243654	0.0243842
0.21691	0.00374	1	0.0008	0.00511	0.01747	0.01837	0.0008	0.00527348	0.0243654	0.0245521
0.1669	0.0219	0.72211	0.00061	0.0032	0.03112	0.02028	0.000690827	0.00405577	0.0317227	0.0245521
0.1261	0.01014	0.48127	0.00035	0.00252	0.01503	0.01223	0.000690827	0.00395543	0.0243654	0.0243842
0.1669	0.01275	0.72211	0.00046	0.00361	0.01427	0.01101	0.000690827	0.00424207	0.0243654	0.0243842
0.1669	0.01138	0.72211	0.00061	0.00252	0.01427	0.02235	0.000690827	0.00395543	0.0243654	0.0252542
0.3665	0.00708	1	0.00053	0.00284	0.0193	0.00991	0.000690827	0.00395543	0.0247119	0.0243842
0.27688	0.00286	1	0.0004	0.00197	0.02972	0.02972	0.000690827	0.00395543	0.0306076	0.0305133
0.07998	0.00708	1	0.0004	0.00197	0.01288	0.00406	0.000690827	0.00395543	0.0243654	0.0243842
0.10096	0.01138	0.72211	0.00053	0.00135	0.0258	0.01357	0.000690827	0.00395543	0.0277419	0.0243842
0.15588	0.00286	1	0.00061	0.00197	0.01503	0.00798	0.000690827	0.00395543	0.0243654	0.0243842
0.10885	0.01591	1	0.00031	0.00223	0.0158	0.01837	0.000690827	0.00395543	0.0243654	0.0245521
0.1261	0.00139	1	0.00031	0.00223	0.0054	0.00798	0.000690827	0.00395543	0.0243654	0.0243842
0.05298	0.01014	0.72211	0.00015	0.00091	0.01747	0.00455	0.000690827	0.00395543	0.0243654	0.0243842
0.1907	0.00626	1	0.00053	0.0032	0.00676	0.00991	0.000690827	0.00405577	0.0243654	0.0243842
0.21691	0.00427	1	0.0004	0.00197	0.00938	0.02235	0.000690827	0.00395543	0.0243654	0.0252542
0.05298	0.01138	1	0.0004	0.00135	0.0158	0.01357	0.000690827	0.00395543	0.0243654	0.0243842
0.09352	0.00286	1	0.00023	0.00135	0.01503	0.02235	0.000690827	0.00395543	0.0243654	0.0252542
0.13549	0.00708	0.72211	0.00061	0.0032	0.02461	0.02461	0.000690827	0.00405577	0.0271334	0.0262927
0.09352	0.00427	1	0.00031	0.00197	0.02235	0.02461	0.000690827	0.00395543	0.0258681	0.0262927
0.11723	0.00249	1	0.00015	0.0007	0.0158	0.01357	0.000690827	0.00395543	0.0243654	0.0243842
0.13549	0.00427	1	0.00053	0.00197	0.01747	0.01503	0.000690827	0.00395543	0.0243654	0.0243842
0.10885	0.00103	1	0.00031	0.00174	0.00676	0.00511	0.000690827	0.00395543	0.0243654	0.0243842
0.09352	0.00626	1	0.0004	0.00135	0.01837	0.01357	0.000690827	0.00395543	0.0247119	0.0243842
0.1669	0.01972	0.72211	0.00046	0.00197	0.0258	0.01223	0.000690827	0.00395543	0.0277419	0.0243842
0.1669	0.00286	1	0.00061	0.00361	0.01663	0.02028	0.000690827	0.00424207	0.0243654	0.0245521
0.10096	0.00427	1	0.00061	0.00284	0.01663	0.01223	0.000690827	0.00395543	0.0243654	0.0243842
0.23095	0.00901	1	0.0008	0.00361	0.02345	0.01223	0.0008	0.00424207	0.0264374	0.0243842
0.14541	0.00187	1	0.00023	0.00119	0.0116	0.01837	0.000690827	0.00395543	0.0243654	0.0245521
0.13549	0.01426	1	0.0004	0.00223	0.0054	0.00991	0.000690827	0.00395543	0.0243654	0.0243842
0.34726	0.00427	1	0.0008	0.00361	0.02235	0.03572	0.0008	0.00424207	0.0258681	0.0358275
0.23095	0.01275	1	0.00061	0.00361	0.01747	0.00991	0.000690827	0.00424207	0.0243654	0.0243842
0.15588	0.00552	1	0.00035	0.00153	0.02706	0.01837	0.000690827	0.00395543	0.0286047	0.0245521
0.10096	0.00552	1	0.0002	0.00174	0.00605	0.0064	0.000690827	0.00395543	0.0243654	0.0243842
0.05766	0.00552	1	0.0004	0.00153	0.01663	0.00991	0.000690827	0.00395543	0.0243654	0.0243842
0.10885	0.00552	0.72211	0.00017	0.00135	0.0054	0.01503	0.000690827	0.00395543	0.0243654	0.0243842
0.14541	0.00626	0.48127	0.00017	0.00153	0.0116	0.01101	0.000690827	0.00395543	0.0243654	0.0243842
0.09352	0.00626	1	0.00035	0.00174	0.00842	0.01837	0.000690827	0.00395543	0.0243654	0.0245521
0.1261	0.00103	0.71361	0.00011	0.0008	0.00605	0.02235	0.000690827	0.00395543	0.0243654	0.0252542
0.10096	0.00327	1	0.00015	0.00091	0.00938	0.01101	0.000690827	0.00395543	0.0243654	0.0243842
0.23095	0.00486	1	0.0008	0.00406	0.02345	0.0326	0.0008	0.00448619	0.0264374	0.0330629
0.11723	0.00626	1	0.0004	0.00197	0.01747	0.02706	0.000690827	0.00395543	0.0243654	0.0282759
0.13549	0.00374	1	0.00031	0.00252	0.01044	0.02235	0.000690827	0.00395543	0.0243654	0.0252542
0.10096	0.00427	1	0.0004	0.00153	0.02461	0.01357	0.000690827	0.00395543	0.0271334	0.0243842
0.09352	0.00374	1	0.00023	0.00153	0.0089	0.01357	0.000690827	0.00395543	0.0243654	0.0243842
0.06807	0.00327	1	0.00023	0.0008	0.00842	0.01663	0.000690827	0.00395543	0.0243654	0.0243842
0.10885	0.00427	1	0.0008	0.00455	0.01837	0.02461	0.0008	0.00485592	0.0247119	0.0262927
0.32868	0.00486	1	0.00061	0.00455	0.01427	0.01357	0.000690827	0.00485592	0.0243654	0.0243842
0.23095	0.00216	0.71361	0.00061	0.00284	0.01427	0.01357	0.000690827	0.00395543	0.0243654	0.0243842
0.09352	0.00427	1	0.0002	0.00135	0.00938	0.00715	0.000690827	0.00395543	0.0243654	0.0243842
0.06269	0.00374	1	0.00015	0.00135	0.00482	0.00455	0.000690827	0.00395543	0.0243654	0.0243842
0.27688	0.00708	1	0.0008	0.00455	0.01747	0.02028	0.0008	0.00485592	0.0243654	0.0245521
0.10096	0.00626	0.72211	0.00031	0.00104	0.02028	0.02028	0.000690827	0.00395543	0.0250943	0.0245521
0.21691	0.008	0.72211	0.00061	0.00455	0.02835	0.01357	0.000690827	0.00485592	0.0296548	0.0243842
0.13549	0.00901	0.48127	0.00023	0.0008	0.01747	0.01101	0.000690827	0.00395543	0.0243654	0.0243842
0.07383	0.00327	1	0.00023	0.00104	0.00938	0.01101	0.000690827	0.00395543	0.0243654	0.0243842
0.13549	0.00216	1	0.0002	0.00174	0.00938	0.0064	0.000690827	0.00395543	0.0243654	0.0243842
0.1669	0.01275	1	0.0004	0.00119	0.03112	0.02235	0.000690827	0.00395543	0.0317227	0.0252542
0.21691	0.00552	1	0.0008	0.00511	0.00938	0.01101	0.0008	0.00527348	0.0243654	0.0243842
0.17851	0.00327	1	0.0004	0.00135	0.02128	0.01357	0.000690827	0.00395543	0.0250943	0.0243842
0.09352	0.00708	1	0.00046	0.00284	0.01288	0.01503	0.000690827	0.00395543	0.0243654	0.0243842
0.15588	0.00187	1	0.00031	0.00153	0.0193	0.01503	0.000690827	0.00395543	0.0247119	0.0243842
0.32868	0.00486	1	0.0008	0.00406	0.0193	0.02706	0.0008	0.00448619	0.0247119	0.0282759
0.26093	0.01014	1	0.00061	0.0032	0.02706	0.01837	0.000690827	0.00405577	0.0286047	0.0245521
0.06269	0.00486	1	0.00023	0.00135	0.01223	0.00284	0.000690827	0.00395543	0.0243654	0.0243842
0.21691	0.00427	1	0.0008	0.00406	0.02028	0.00798	0.0008	0.00448619	0.0250943	0.0243842
0.14541	0.00626	1	0.0004	0.00197	0.03572	0.02235	0.000690827	0.00395543	0.0358275	0.0252542
0.23095	0.00327	1	0.00053	0.00406	0.02028	0.02972	0.000690827	0.00448619	0.0250943	0.0305133
0.23095	0.02427	0.72211	0.0008	0.00511	0.03412	0.02706	0.0008	0.00527348	0.0343952	0.0282759
0.31076	0.01014	1	0.00053	0.00361	0.01747	0.01837	0.000690827	0.00424207	0.0243654	0.0245521
0.10096	0.00552	1	0.00013	0.00091	0.00511	0.01223	0.000690827	0.00395543	0.0243654	0.0243842
0.24562	0.00327	1	0.00053	0.00361	0.00715	0.01663	0.000690827	0.00424207	0.0243654	0.0243842
0.15588	0.00626	1	0.00035	0.00174	0.0193	0.00715	0.000690827	0.00395543	0.0247119	0.0243842
0.17851	0.008	0.72211	0.00061	0.00284	0.01663	0.02028	0.000690827	0.00395543	0.0243654	0.0245521
0.09352	0.00626	1	0.00015	0.00091	0.00755	0.0064	0.000690827	0.00395543	0.0243654	0.0243842
0.23095	0.00216	0.71361	0.00023	0.0008	0.0158	0.01837	0.000690827	0.00395543	0.0243654	0.0245521
0.1261	0.01972	0.48127	0.00031	0.00119	0.02128	0.02235	0.000690827	0.00395543	0.0250943	0.0252542
0.14541	0.00286	1	0.00031	0.00197	0.02461	0.02461	0.000690827	0.00395543	0.0271334	0.0262927
0.15588	0.00187	1	0.00031	0.00223	0.01223	0.01503	0.000690827	0.00395543	0.0243654	0.0243842
0.08654	0.00626	1	0.0004	0.00174	0.03112	0.01663	0.000690827	0.00395543	0.0317227	0.0243842
0.1907	0.008	0.72211	0.00053	0.0064	0.00938	0.00798	0.000690827	0.00640641	0.0243654	0.0243842
0.07998	0.00286	1	0.00017	0.00053	0.01288	0.00715	0.000690827	0.00395543	0.0243654	0.0243842
0.14541	0.00216	1	0.00015	0.00104	0.01044	0.01503	0.000690827	0.00395543	0.0243654	0.0243842
0.14541	0.01138	1	0.00053	0.0064	0.00842	0.01223	0.000690827	0.00640641	0.0243654	0.0243842
0.11723	0.00187	1	0.00015	0.0007	0.00842	0.02028	0.000690827	0.00395543	0.0243654	0.0245521
0.14541	0.00249	1	0.0002	0.00119	0.0089	0.01101	0.000690827	0.00395543	0.0243654	0.0243842
0.1907	0.00327	1	0.00053	0.00252	0.01288	0.02028	0.000690827	0.00395543	0.0243654	0.0245521
0.23095	0.00249	1	0.0008	0.00511	0.01427	0.00455	0.0008	0.00527348	0.0243654	0.0243842
0.10885	0.01138	0.72211	0.00031	0.00153	0.02235	0.01837	0.000690827	0.00395543	0.0258681	0.0245521
0.10885	0.01014	1	0.00053	0.00252	0.01427	0.01101	0.000690827	0.00395543	0.0243654	0.0243842
0.1669	0.01275	0.72211	0.0004	0.00197	0.02835	0.02028	0.000690827	0.00395543	0.0296548	0.0245521
0.21691	0.00327	1	0.0008	0.00406	0.0158	0.01101	0.0008	0.00448619	0.0243654	0.0243842
0.09352	0.00374	1	0.0002	0.00119	0.02461	0.01503	0.000690827	0.00395543	0.0271334	0.0243842
0.13549	0.00708	0.72211	0.00026	0.00223	0.00605	0.00798	0.000690827	0.00395543	0.0243654	0.0243842
0.14541	0.00249	1	0.00017	0.00104	0.01288	0.01837	0.000690827	0.00395543	0.0243654	0.0245521
0.06807	0.00249	1	0.00017	0.00119	0.01223	0.02028	0.000690827	0.00395543	0.0243654	0.0245521
0.21691	0.008	1	0.00046	0.0032	0.02706	0.02706	0.000690827	0.00405577	0.0286047	0.0282759
0.08654	0.00626	0.72211	0.0004	0.00284	0.0193	0.02461	0.000690827	0.00395543	0.0247119	0.0262927
0.13549	0.01138	1	0.00046	0.00284	0.0116	0.01837	0.000690827	0.00395543	0.0243654	0.0245521
0.2035	0.00427	1	0.00046	0.00223	0.01503	0.02028	0.000690827	0.00395543	0.0243654	0.0245521
0.07998	0.008	1	0.0004	0.00223	0.00991	0.01101	0.000690827	0.00395543	0.0243654	0.0243842
0.15588	0.01138	0.48127	0.00035	0.00284	0.01044	0.00991	0.000690827	0.00395543	0.0243654	0.0243842
0.21691	0.00626	1	0.0008	0.00511	0.01288	0.00715	0.0008	0.00527348	0.0243654	0.0243842
0.21691	0.00708	1	0.00046	0.00252	0.02128	0.02461	0.000690827	0.00395543	0.0250943	0.0262927
0.21691	0.00249	1	0.00053	0.00135	0.02345	0.01837	0.000690827	0.00395543	0.0264374	0.0245521
0.2035	0.00626	1	0.00046	0.00135	0.01837	0.01837	0.000690827	0.00395543	0.0247119	0.0245521
0.10096	0.00486	1	0.00015	0.00135	0.00842	0.02028	0.000690827	0.00395543	0.0243654	0.0245521
0.21691	0.00187	1	0.00061	0.0032	0.02461	0.02706	0.000690827	0.00405577	0.0271334	0.0282759
0.1669	0.00427	1	0.00046	0.00361	0.00991	0.02235	0.000690827	0.00424207	0.0243654	0.0252542
0.10096	0.00088	0.71361	0.00046	0.00135	0.00938	0.01223	0.000690827	0.00395543	0.0243654	0.0243842
0.15588	0.00286	1	0.0002	0.00119	0.01288	0.01357	0.000690827	0.00395543	0.0243654	0.0243842
0.13549	0.00427	1	0.00061	0.00252	0.02235	0.02972	0.000690827	0.00395543	0.0258681	0.0305133
0.17851	0.01591	1	0.0004	0.00223	0.00938	0.00991	0.000690827	0.00395543	0.0243654	0.0243842
0.17851	0.00249	0.71361	0.00026	0.00252	0.01101	0.01101	0.000690827	0.00395543	0.0243654	0.0243842
0.34726	0.00708	1	0.00046	0.00174	0.0193	0.02461	0.000690827	0.00395543	0.0247119	0.0262927
0.2035	0.01138	1	0.00046	0.00153	0.01747	0.01837	0.000690827	0.00395543	0.0243654	0.0245521
0.1669	0.00374	1	0.00046	0.00284	0.02028	0.01503	0.000690827	0.00395543	0.0250943	0.0243842
0.15588	0.00103	1	0.00023	0.00135	0.01427	0.01837	0.000690827	0.00395543	0.0243654	0.0245521
0.07383	0.01014	0.72211	0.00046	0.00153	0.00938	0.00715	0.000690827	0.00395543	0.0243654	0.0243842
0.1261	0.01426	0.48127	0.00046	0.00406	0.00755	0.0064	0.000690827	0.00448619	0.0243654	0.0243842
0.1669	0.01773	0.72211	0.00061	0.0032	0.0193	0.00991	0.000690827	0.00405577	0.0247119	0.0243842
0.21691	0.00901	0.72211	0.0008	0.00406	0.0116	0.00572	0.0008	0.00448619	0.0243654	0.0243842
0.27688	0.00427	1	0.00061	0.00252	0.02972	0.03572	0.000690827	0.00395543	0.0306076	0.0358275
0.1261	0.01275	0.72211	0.00031	0.00119	0.01223	0.01357	0.000690827	0.00395543	0.0243654	0.0243842
0.15588	0.008	1	0.00061	0.0032	0.01288	0.0089	0.000690827	0.00405577	0.0243654	0.0243842
0.10885	0.00486	1	0.0004	0.00197	0.01503	0.01101	0.000690827	0.00395543	0.0243654	0.0243842
0.17851	0.00626	0.72211	0.00061	0.00455	0.02028	0.01357	0.000690827	0.00485592	0.0250943	0.0243842
0.13549	0.00552	1	0.00053	0.00252	0.02345	0.00991	0.000690827	0.00395543	0.0264374	0.0243842
0.14541	0.00626	1	0.0004	0.00223	0.02972	0.01223	0.000690827	0.00395543	0.0306076	0.0243842
0.24562	0.01138	0.72211	0.0007	0.00798	0.01288	0.0089	0.000761697	0.00798	0.0243654	0.0243842
0.06807	0.01138	1	0.00046	0.00284	0.01288	0.00715	0.000690827	0.00395543	0.0243654	0.0243842
0.13549	0.00552	1	0.00046	0.00223	0.01044	0.00991	0.000690827	0.00395543	0.0243654	0.0243842
0.06269	0.00162	1	0.00023	0.00104	0.00842	0.00572	0.000690827	0.00395543	0.0243654	0.0243842
0.13549	0.008	0.72211	0.00053	0.00252	0.01503	0.00715	0.000690827	0.00395543	0.0243654	0.0243842
0.17851	0.00327	1	0.0008	0.00511	0.00798	0.0089	0.0008	0.00527348	0.0243654	0.0243842
0.17851	0.00088	1	0.00023	0.00091	0.00715	0.01503	0.000690827	0.00395543	0.0243654	0.0243842
0.07998	0.00249	1	0.00035	0.00153	0.00605	0.00572	0.000690827	0.00395543	0.0243654	0.0243842
0.13549	0.00374	1	0.00046	0.00252	0.01837	0.01101	0.000690827	0.00395543	0.0247119	0.0243842
0.15588	0.00075	0.71361	0.0002	0.00091	0.01044	0.01663	0.000690827	0.00395543	0.0243654	0.0243842
0.2035	0.00486	1	0.0002	0.00135	0.01427	0.01223	0.000690827	0.00395543	0.0243654	0.0243842
0.15588	0.00162	0.71361	0.00015	0.0008	0.01837	0.02461	0.000690827	0.00395543	0.0247119	0.0262927
0.11723	0.00486	0.72211	0.00023	0.00104	0.0116	0.01663	0.000690827	0.00395543	0.0243654	0.0243842
0.11723	0.00486	1	0.00013	0.0007	0.01044	0.00511	0.000690827	0.00395543	0.0243654	0.0243842
0.17851	0.00552	1	0.00053	0.00406	0.0116	0.01223	0.000690827	0.00448619	0.0243654	0.0243842
0.24562	0.00286	1	0.00046	0.0032	0.01101	0.01223	0.000690827	0.00405577	0.0243654	0.0243842
0.14541	0.00216	1	0.00035	0.00135	0.00842	0.01837	0.000690827	0.00395543	0.0243654	0.0245521
0.1261	0.00249	1	0.00031	0.00252	0.01663	0.01223	0.000690827	0.00395543	0.0243654	0.0243842
0.14541	0.00216	1	0.0004	0.00223	0.02028	0.01503	0.000690827	0.00395543	0.0250943	0.0243842
0.17851	0.00552	1	0.00061	0.00252	0.0193	0.01837	0.000690827	0.00395543	0.0247119	0.0245521
0.17851	0.01275	0.72211	0.00031	0.00223	0.01288	0.02235	0.000690827	0.00395543	0.0243654	0.0252542
0.17851	0.00626	1	0.00053	0.0032	0.00938	0.00572	0.000690827	0.00405577	0.0243654	0.0243842
0.14541	0.00216	1	0.0007	0.0064	0.00511	0.0064	0.000761697	0.00640641	0.0243654	0.0243842
0.17851	0.00216	1	0.00053	0.00284	0.01837	0.01663	0.000690827	0.00395543	0.0247119	0.0243842
0.21691	0.00286	1	0.0008	0.00252	0.0158	0.02028	0.0008	0.00395543	0.0243654	0.0245521
0.07998	0.00626	1	0.00031	0.00252	0.01044	0.02028	0.000690827	0.00395543	0.0243654	0.0245521
0.1669	0.00708	1	0.00061	0.00406	0.00676	0.00715	0.000690827	0.00448619	0.0243654	0.0243842
0.21691	0.00552	1	0.0008	0.00572	0.02028	0.02028	0.0008	0.00579534	0.0250943	0.0245521
0.1669	0.008	1	0.00061	0.0032	0.0326	0.01837	0.000690827	0.00405577	0.0330629	0.0245521
0.10096	0.00552	1	0.00013	0.00035	0.00755	0.00991	0.000690827	0.00395543	0.0243654	0.0243842
0.06807	0.00374	1	0.0002	0.00153	0.00676	0.0064	0.000690827	0.00395543	0.0243654	0.0243842
0.3665	0.00626	1	0.0007	0.0064	0.01503	0.01837	0.000761697	0.00640641	0.0243654	0.0245521
0.17851	0.00427	1	0.0008	0.00572	0.01663	0.0064	0.0008	0.00579534	0.0243654	0.0243842
0.29349	0.00708	1	0.00053	0.00223	0.0158	0.01357	0.000690827	0.00395543	0.0243654	0.0243842
0.10096	0.01138	0.72211	0.00061	0.00284	0.0116	0.0064	0.000690827	0.00395543	0.0243654	0.0243842
0.05298	0.00626	1	0.00017	0.00135	0.01044	0.00798	0.000690827	0.00395543	0.0243654	0.0243842
0.10096	0.01014	0.72211	0.00026	0.00091	0.01044	0.01503	0.000690827	0.00395543	0.0243654	0.0243842
0.05766	0.01773	0.48127	0.0004	0.00197	0.01288	0.0064	0.000690827	0.00395543	0.0243654	0.0243842
0.07998	0.00901	0.72211	0.00017	0.0008	0.01427	0.00715	0.000690827	0.00395543	0.0243654	0.0243842
0.1261	0.00626	0.72211	0.0004	0.00153	0.02345	0.02235	0.000690827	0.00395543	0.0264374	0.0252542
0.11723	0.00374	1	0.00013	0.00104	0.01427	0.02706	0.000690827	0.00395543	0.0243654	0.0282759
0.27688	0.00626	1	0.00061	0.00284	0.02028	0.02972	0.000690827	0.00395543	0.0250943	0.0305133
0.15588	0.00162	1	0.00023	0.00091	0.01044	0.01357	0.000690827	0.00395543	0.0243654	0.0243842
0.07998	0.01591	1	0.0007	0.00455	0.00938	0.00572	0.000761697	0.00485592	0.0243654	0.0243842
0.24562	0.00901	0.72211	0.00035	0.00174	0.02028	0.02972	0.000690827	0.00395543	0.0250943	0.0305133
0.07383	0.01138	0.72211	0.00031	0.00104	0.0116	0.01663	0.000690827	0.00395543	0.0243654	0.0243842
0.13549	0.01138	0.72211	0.00053	0.00252	0.0116	0.01101	0.000690827	0.00395543	0.0243654	0.0243842
0.13549	0.00626	1	0.00046	0.00135	0.0258	0.03572	0.000690827	0.00395543	0.0277419	0.0358275
0.1669	0.00552	1	0.00061	0.00361	0.02972	0.02972	0.000690827	0.00424207	0.0306076	0.0305133
0.3665	0.008	1	0.0007	0.00406	0.0326	0.01663	0.000761697	0.00448619	0.0330629	0.0243842
0.1669	0.01014	1	0.00061	0.00252	0.02345	0.01357	0.000690827	0.00395543	0.0264374	0.0243842
0.1261	0.00286	1	0.00061	0.00284	0.01288	0.0089	0.000690827	0.00395543	0.0243654	0.0243842
0.15588	0.00327	1	0.00031	0.00197	0.00842	0.00511	0.000690827	0.00395543	0.0243654	0.0243842
0.38639	0.00901	1	0.00061	0.00455	0.02706	0.02972	0.000690827	0.00485592	0.0286047	0.0305133
0.10096	0.00626	1	0.00017	0.00104	0.0116	0.01663	0.000690827	0.00395543	0.0243654	0.0243842
0.10096	0.00162	1	0.00031	0.00174	0.01223	0.02461	0.000690827	0.00395543	0.0243654	0.0262927
0.24562	0.00552	1	0.0008	0.00455	0.02706	0.0326	0.0008	0.00485592	0.0286047	0.0330629
0.13549	0.00626	1	0.0008	0.00455	0.01357	0.01503	0.0008	0.00485592	0.0243654	0.0243842
0.10096	0.00708	1	0.00061	0.0032	0.00842	0.00798	0.000690827	0.00405577	0.0243654	0.0243842
0.17851	0.01138	0.72211	0.00053	0.0032	0.02461	0.00455	0.000690827	0.00405577	0.0271334	0.0243842
0.17851	0.00626	1	0.0004	0.00284	0.00842	0.02028	0.000690827	0.00395543	0.0243654	0.0245521
0.11723	0.00103	1	0.00053	0.00284	0.0116	0.02028	0.000690827	0.00395543	0.0243654	0.0245521
0.1669	0.00552	1	0.00046	0.0032	0.01357	0.01663	0.000690827	0.00405577	0.0243654	0.0243842
0.08654	0.00901	0.72211	0.00035	0.00119	0.01288	0.02028	0.000690827	0.00395543	0.0243654	0.0245521
0.2035	0.00249	1	0.00031	0.00223	0.02345	0.00715	0.000690827	0.00395543	0.0264374	0.0243842
0.11723	0.00901	0.72211	0.00061	0.00252	0.0158	0.01663	0.000690827	0.00395543	0.0243654	0.0243842
0.10885	0.00249	1	0.00023	0.00104	0.01288	0.0064	0.000690827	0.00395543	0.0243654	0.0243842
0.09352	0.008	1	0.00061	0.00284	0.00605	0.0089	0.000690827	0.00395543	0.0243654	0.0243842
0.08654	0.00162	1	0.00017	0.0007	0.01288	0.0089	0.000690827	0.00395543	0.0243654	0.0243842
0.15588	0.00139	1	0.00061	0.00197	0.01288	0.02028	0.000690827	0.00395543	0.0243654	0.0245521
0.24562	0.00187	1	0.0008	0.00511	0.01427	0.02028	0.0008	0.00527348	0.0243654	0.0245521
0.15588	0.00901	1	0.00046	0.00153	0.01427	0.01503	0.000690827	0.00395543	0.0243654	0.0243842
0.1669	0.00626	1	0.0008	0.00406	0.0158	0.00715	0.0008	0.00448619	0.0243654	0.0243842
0.07998	0.00139	1	0.00031	0.00284	0.00991	0.02235	0.000690827	0.00395543	0.0243654	0.0252542
0.07998	0.00901	1	0.00053	0.00406	0.00605	0.00715	0.000690827	0.00448619	0.0243654	0.0243842
0.05766	0.00901	1	0.00061	0.00284	0.01044	0.00715	0.000690827	0.00395543	0.0243654	0.0243842
0.1907	0.00486	1	0.00035	0.00197	0.01747	0.02706	0.000690827	0.00395543	0.0243654	0.0282759
0.1261	0.008	1	0.00013	0.00104	0.01288	0.01503	0.000690827	0.00395543	0.0243654	0.0243842
0.14541	0.00626	1	0.0008	0.0064	0.01747	0.00715	0.0008	0.00640641	0.0243654	0.0243842
0.17851	0.00374	1	0.0008	0.00572	0.0158	0.01357	0.0008	0.00579534	0.0243654	0.0243842
0.1907	0.01138	1	0.0007	0.00511	0.01747	0.01357	0.000761697	0.00527348	0.0243654	0.0243842
0.10096	0.00427	0.72211	0.00061	0.00361	0.01663	0.0089	0.000690827	0.00424207	0.0243654	0.0243842
0.14541	0.00286	1	0.00031	0.00135	0.01044	0.01223	0.000690827	0.00395543	0.0243654	0.0243842
0.21691	0.00327	1	0.00026	0.00197	0.00938	0.00798	0.000690827	0.00395543	0.0243654	0.0243842
0.17851	0.01014	1	0.0008	0.00572	0.0193	0.01357	0.0008	0.00579534	0.0247119	0.0243842
0.17851	0.00075	0.71361	0.0008	0.00455	0.01101	0.0089	0.0008	0.00485592	0.0243654	0.0243842
0.31076	0.00103	1	0.00046	0.00197	0.01837	0.0326	0.000690827	0.00395543	0.0247119	0.0330629
0.34726	0.00162	1	0.00061	0.00223	0.02345	0.03909	0.000690827	0.00395543	0.0264374	0.0391291
0.06807	0.01426	0.48127	0.0004	0.00135	0.02345	0.00572	0.000690827	0.00395543	0.0264374	0.0243842
0.26093	0.00286	1	0.00031	0.00223	0.01503	0.01503	0.000690827	0.00395543	0.0243654	0.0243842
0.10096	0.00139	1	0.0002	0.00223	0.00572	0.00798	0.000690827	0.00395543	0.0243654	0.0243842
0.10885	0.01275	1	0.00053	0.00252	0.0193	0.0089	0.000690827	0.00395543	0.0247119	0.0243842
0.23095	0.008	0.72211	0.0008	0.00406	0.03412	0.02028	0.0008	0.00448619	0.0343952	0.0245521
0.23095	0.00427	1	0.00061	0.0032	0.02128	0.01223	0.000690827	0.00405577	0.0250943	0.0243842
0.1261	0.01138	0.72211	0.00023	0.0008	0.01747	0.01663	0.000690827	0.00395543	0.0243654	0.0243842
0.17851	0.0012	0.71361	0.0004	0.00174	0.01101	0.02028	0.000690827	0.00395543	0.0243654	0.0245521
0.1669	0.01138	0.72211	0.00046	0.00197	0.01837	0.01101	0.000690827	0.00395543	0.0247119	0.0243842
0.17851	0.00139	1	0.00061	0.00284	0.01427	0.02235	0.000690827	0.00395543	0.0243654	0.0252542
0.23095	0.00552	1	0.00031	0.00153	0.0193	0.00798	0.000690827	0.00395543	0.0247119	0.0243842
0.1907	0.008	1	0.00053	0.00252	0.03412	0.01503	0.000690827	0.00395543	0.0343952	0.0243842
0.27688	0.008	1	0.0008	0.00511	0.01223	0.01837	0.0008	0.00527348	0.0243654	0.0245521
0.21691	0.00626	1	0.00061	0.00284	0.03572	0.02235	0.000690827	0.00395543	0.0358275	0.0252542
0.08654	0.00626	1	0.00015	0.0007	0.00605	0.01101	0.000690827	0.00395543	0.0243654	0.0243842
0.2035	0.008	1	0.00046	0.00284	0.0089	0.01837	0.000690827	0.00395543	0.0243654	0.0245521
0.10885	0.00327	1	0.00061	0.00284	0.01288	0.02235	0.000690827	0.00395543	0.0243654	0.0252542
0.17851	0.00626	1	0.00061	0.00197	0.02835	0.02972	0.000690827	0.00395543	0.0296548	0.0305133
0.24562	0.00552	1	0.00053	0.0032	0.01044	0.01223	0.000690827	0.00405577	0.0243654	0.0243842
0.10885	0.00427	1	0.00017	0.00119	0.00842	0.01503	0.000690827	0.00395543	0.0243654	0.0243842
0.1907	0.00552	1	0.00061	0.00361	0.01288	0.01357	0.000690827	0.00424207	0.0243654	0.0243842
0.3665	0.00552	1	0.0007	0.00284	0.0193	0.02235	0.000761697	0.00395543	0.0247119	0.0252542
0.1261	0.00374	1	0.00017	0.00119	0.01427	0.00715	0.000690827	0.00395543	0.0243654	0.0243842
0.1669	0.00286	1	0.00046	0.00406	0.00755	0.01663	0.000690827	0.00448619	0.0243654	0.0243842
0.10096	0.01275	0.72211	0.00031	0.00197	0.00842	0.01101	0.000690827	0.00395543	0.0243654	0.0243842
0.1669	0.02686	0.72211	0.00046	0.00197	0.01747	0.01837	0.000690827	0.00395543	0.0243654	0.0245521
0.23095	0.01138	1	0.00053	0.00511	0.00676	0.00991	0.000690827	0.00527348	0.0243654	0.0243842
0.1669	0.0219	0.72211	0.00061	0.0032	0.0116	0.01357	0.000690827	0.00405577	0.0243654	0.0243842
0.24562	0.00901	1	0.00053	0.00406	0.01837	0.01663	0.000690827	0.00448619	0.0247119	0.0243842
0.27688	0.00626	1	0.00053	0.00284	0.01044	0.02235	0.000690827	0.00395543	0.0243654	0.0252542
0.14541	0.00427	1	0.0002	0.00135	0.0158	0.01357	0.000690827	0.00395543	0.0243654	0.0243842
0.09352	0.008	1	0.00017	0.00135	0.00676	0.00406	0.000690827	0.00395543	0.0243654	0.0243842
0.07998	0.00626	1	0.00017	0.0007	0.01288	0.02028	0.000690827	0.00395543	0.0243654	0.0245521
0.10885	0.00216	1	0.00017	0.00119	0.01223	0.00798	0.000690827	0.00395543	0.0243654	0.0243842
0.13549	0.008	0.72211	0.00061	0.0032	0.02972	0.02028	0.000690827	0.00405577	0.0306076	0.0245521
0.10885	0.008	1	0.00026	0.00223	0.01427	0.02235	0.000690827	0.00395543	0.0243654	0.0252542
0.2035	0.01014	0.72211	0.00046	0.00197	0.02128	0.01663	0.000690827	0.00395543	0.0250943	0.0243842
0.1907	0.008	1	0.00046	0.00223	0.01747	0.01357	0.000690827	0.00395543	0.0243654	0.0243842
0.34726	0.00286	1	0.00061	0.00406	0.01663	0.02461	0.000690827	0.00448619	0.0243654	0.0262927
0.1907	0.00374	1	0.00023	0.00153	0.01427	0.01101	0.000690827	0.00395543	0.0243654	0.0243842
0.15588	0.00427	1	0.00026	0.00153	0.00605	0.00798	0.000690827	0.00395543	0.0243654	0.0243842
0.10096	0.00249	1	0.00017	0.00035	0.0116	0.02028	0.000690827	0.00395543	0.0243654	0.0245521
0.24562	0.00486	1	0.00035	0.00197	0.01427	0.01663	0.000690827	0.00395543	0.0243654	0.0243842
0.3665	0.01275	1	0.0007	0.00406	0.03736	0.02972	0.000761697	0.00448619	0.0374349	0.0305133
0.11723	0.01138	0.72211	0.00015	0.00119	0.0116	0.00715	0.000690827	0.00395543	0.0243654	0.0243842
0.05766	0.00552	0.72211	8e-05	0.00026	0.00938	0.00715	0.000690827	0.00395543	0.0243654	0.0243842
0.05766	0.00427	1	0.00013	0.00091	0.0054	0.01357	0.000690827	0.00395543	0.0243654	0.0243842
0.24562	0.01138	1	0.00031	0.00153	0.02345	0.02461	0.000690827	0.00395543	0.0264374	0.0262927
0.10096	0.00901	1	0.0004	0.00153	0.02235	0.0089	0.000690827	0.00395543	0.0258681	0.0243842
0.23095	0.00552	1	0.00061	0.0032	0.0116	0.0064	0.000690827	0.00405577	0.0243654	0.0243842
0.26093	0.00427	1	0.00046	0.00223	0.02461	0.02706	0.000690827	0.00395543	0.0271334	0.0282759
0.14541	0.00427	1	0.0004	0.00174	0.0116	0.01663	0.000690827	0.00395543	0.0243654	0.0243842
0.1669	0.00286	1	0.00061	0.00361	0.00938	0.02028	0.000690827	0.00424207	0.0243654	0.0245521
0.10096	0.00427	1	0.00023	0.00153	0.0116	0.00715	0.000690827	0.00395543	0.0243654	0.0243842
0.07998	0.00374	1	0.0004	0.00197	0.0116	0.00991	0.000690827	0.00395543	0.0243654	0.0243842
0.2035	0.00187	1	0.00023	0.00174	0.01044	0.01357	0.000690827	0.00395543	0.0243654	0.0243842
0.1669	0.00626	1	0.00046	0.00252	0.0193	0.01837	0.000690827	0.00395543	0.0247119	0.0245521
0.10885	0.00187	1	0.00023	0.00119	0.00842	0.01101	0.000690827	0.00395543	0.0243654	0.0243842
0.2035	0.00286	1	0.00046	0.00252	0.02706	0.02461	0.000690827	0.00395543	0.0286047	0.0262927
0.06807	0.00162	1	0.00023	0.00135	0.0064	0.01101	0.000690827	0.00395543	0.0243654	0.0243842
0.11723	0.01275	0.72211	0.00046	0.00361	0.0116	0.0089	0.000690827	0.00424207	0.0243654	0.0243842
0.27688	0.00708	1	0.0004	0.00284	0.01288	0.01837	0.000690827	0.00395543	0.0243654	0.0245521
0.23095	0.00427	1	0.0008	0.00361	0.0193	0.01663	0.0008	0.00424207	0.0247119	0.0243842
0.15588	0.00374	0.71361	0.00053	0.00223	0.0158	0.02972	0.000690827	0.00395543	0.0243654	0.0305133
0.17851	0.00327	1	0.00053	0.00174	0.02128	0.02235	0.000690827	0.00395543	0.0250943	0.0252542
0.09352	0.00708	0.48127	0.00031	0.00223	0.01747	0.00798	0.000690827	0.00395543	0.0243654	0.0243842
0.27688	0.00552	1	0.00053	0.00284	0.01044	0.02028	0.000690827	0.00395543	0.0243654	0.0245521
0.13549	0.0219	0.48127	0.00061	0.00406	0.01044	0.01101	0.000690827	0.00448619	0.0243654	0.0243842
0.24562	0.00708	0.72211	0.00061	0.0032	0.0193	0.02235	0.000690827	0.00405577	0.0247119	0.0252542
0.2035	0.00187	1	0.00031	0.00153	0.02128	0.02235	0.000690827	0.00395543	0.0250943	0.0252542
0.06269	0.00327	1	0.0002	0.00104	0.0043	0.01101	0.000690827	0.00395543	0.0243654	0.0243842
0.07998	0.00286	1	0.00023	0.00135	0.01223	0.00798	0.000690827	0.00395543	0.0243654	0.0243842
0.2035	0.00216	1	0.00061	0.00455	0.01837	0.02972	0.000690827	0.00485592	0.0247119	0.0305133
0.1261	0.00249	1	0.00015	0.0008	0.01357	0.01837	0.000690827	0.00395543	0.0243654	0.0245521
0.08654	0.00486	1	0.0004	0.00197	0.01288	0.0089	0.000690827	0.00395543	0.0243654	0.0243842
0.1907	0.00486	1	0.0007	0.00572	0.01503	0.0064	0.000761697	0.00579534	0.0243654	0.0243842
0.2035	0.00374	1	0.00046	0.00252	0.00842	0.01357	0.000690827	0.00395543	0.0243654	0.0243842
0.13549	0.008	1	0.00046	0.00284	0.02028	0.01663	0.000690827	0.00395543	0.0250943	0.0243842
0.14541	0.00286	1	0.00035	0.00223	0.0116	0.01503	0.000690827	0.00395543	0.0243654	0.0243842
0.23095	0.00216	0.71361	0.0008	0.0032	0.02028	0.01503	0.0008	0.00405577	0.0250943	0.0243842
0.21691	0.01591	0.72211	0.0008	0.00406	0.03112	0.02028	0.0008	0.00448619	0.0317227	0.0245521
0.08654	0.01138	0.48127	0.00035	0.00197	0.00842	0.02028	0.000690827	0.00395543	0.0243654	0.0245521
0.15588	0.01138	0.48127	0.00061	0.00197	0.0193	0.00511	0.000690827	0.00395543	0.0247119	0.0243842
0.14541	0.00486	1	0.00053	0.0032	0.00605	0.01357	0.000690827	0.00405577	0.0243654	0.0243842
0.13549	0.02427	0.72211	0.00031	0.00197	0.01044	0.01837	0.000690827	0.00395543	0.0243654	0.0245521
0.1261	0.00327	1	0.00046	0.00252	0.00605	0.01663	0.000690827	0.00395543	0.0243654	0.0243842
0.14541	0.00139	1	0.00031	0.00174	0.01837	0.01357	0.000690827	0.00395543	0.0247119	0.0243842
0.17851	0.00088	0.71361	0.00023	0.00153	0.01101	0.01837	0.000690827	0.00395543	0.0243654	0.0245521
0.10885	0.00327	1	0.0007	0.00511	0.00572	0.00511	0.000761697	0.00527348	0.0243654	0.0243842
0.1669	0.00427	1	0.00061	0.00174	0.02235	0.02972	0.000690827	0.00395543	0.0258681	0.0305133
0.07998	0.00626	1	0.0004	0.00252	0.0116	0.00572	0.000690827	0.00395543	0.0243654	0.0243842
0.13549	0.00626	0.72211	0.0004	0.00284	0.01288	0.01837	0.000690827	0.00395543	0.0243654	0.0245521
0.21691	0.00374	1	0.00023	0.0008	0.00755	0.0089	0.000690827	0.00395543	0.0243654	0.0243842
0.10096	0.01426	0.72211	0.00035	0.00119	0.01747	0.00991	0.000690827	0.00395543	0.0243654	0.0243842
0.05298	0.00327	1	7e-05	0.00053	0.00842	0.02028	0.000690827	0.00395543	0.0243654	0.0245521
0.10885	0.01426	1	0.00026	0.00197	0.00755	0.0064	0.000690827	0.00395543	0.0243654	0.0243842
0.09352	0.00286	1	0.0002	0.00104	0.01288	0.0089	0.000690827	0.00395543	0.0243654	0.0243842
0.13549	0.00374	1	0.00023	0.0008	0.0158	0.01357	0.000690827	0.00395543	0.0243654	0.0243842
0.09352	0.00901	1	0.00035	0.00223	0.0258	0.01357	0.000690827	0.00395543	0.0277419	0.0243842
0.26093	0.01426	0.72211	0.00061	0.00455	0.02128	0.01357	0.000690827	0.00485592	0.0250943	0.0243842
0.1907	0.00327	1	0.00023	0.00174	0.00938	0.01223	0.000690827	0.00395543	0.0243654	0.0243842
0.11723	0.00552	1	0.00053	0.0032	0.01427	0.01503	0.000690827	0.00405577	0.0243654	0.0243842
0.08654	0.00427	1	0.00015	0.00135	0.0116	0.01357	0.000690827	0.00395543	0.0243654	0.0243842
0.17851	0.008	1	0.00046	0.00174	0.0258	0.01837	0.000690827	0.00395543	0.0277419	0.0245521
0.1261	0.00088	0.71361	0.0002	0.00135	0.01427	0.00991	0.000690827	0.00395543	0.0243654	0.0243842
0.07383	0.01138	1	0.00015	0.0008	0.0158	0.02028	0.000690827	0.00395543	0.0243654	0.0245521
0.13549	0.008	0.72211	0.0004	0.00197	0.02128	0.01503	0.000690827	0.00395543	0.0250943	0.0243842
0.14541	0.00216	1	0.00017	0.00104	0.01427	0.0326	0.000690827	0.00395543	0.0243654	0.0330629
0.10885	0.00249	1	0.00017	0.00104	0.01357	0.01223	0.000690827	0.00395543	0.0243654	0.0243842
0.11723	0.00552	1	0.00023	0.00119	0.0193	0.02028	0.000690827	0.00395543	0.0247119	0.0245521
0.1669	0.00901	0.72211	0.0004	0.00135	0.0193	0.01663	0.000690827	0.00395543	0.0247119	0.0243842
0.10885	0.01014	0.72211	0.00046	0.00197	0.01747	0.00511	0.000690827	0.00395543	0.0243654	0.0243842
0.29349	0.00901	1	0.0008	0.00511	0.01747	0.02028	0.0008	0.00527348	0.0243654	0.0245521
0.15588	0.00552	1	0.00046	0.0032	0.02128	0.01357	0.000690827	0.00405577	0.0250943	0.0243842
0.2035	0.01138	0.48127	0.00061	0.00361	0.01288	0.02706	0.000690827	0.00424207	0.0243654	0.0282759
0.11723	0.00139	1	0.00023	0.00091	0.02235	0.03572	0.000690827	0.00395543	0.0258681	0.0358275
0.13549	0.00427	1	0.00046	0.00197	0.01427	0.01837	0.000690827	0.00395543	0.0243654	0.0245521
0.1669	0.00216	1	0.00023	0.00091	0.00842	0.01101	0.000690827	0.00395543	0.0243654	0.0243842
0.21691	0.00901	1	0.0008	0.00252	0.0258	0.02461	0.0008	0.00395543	0.0277419	0.0262927
0.07383	0.00552	1	0.00061	0.00284	0.01427	0.02028	0.000690827	0.00395543	0.0243654	0.0245521
0.13549	0.00216	1	0.00017	0.00061	0.0116	0.02235	0.000690827	0.00395543	0.0243654	0.0252542
0.11723	0.01014	1	0.00035	0.00197	0.00798	0.01357	0.000690827	0.00395543	0.0243654	0.0243842
0.14541	0.00901	1	0.00053	0.00406	0.01663	0.01357	0.000690827	0.00448619	0.0243654	0.0243842
0.1669	0.00626	1	0.00046	0.00174	0.02972	0.02235	0.000690827	0.00395543	0.0306076	0.0252542
0.10885	0.00552	1	0.00017	0.0008	0.0158	0.01223	0.000690827	0.00395543	0.0243654	0.0243842
0.07998	0.00427	1	0.0004	0.00153	0.02835	0.00798	0.000690827	0.00395543	0.0296548	0.0243842
0.27688	0.0012	1	0.0008	0.0032	0.02235	0.01503	0.0008	0.00405577	0.0258681	0.0243842
0.1261	0.00486	1	0.0002	0.00119	0.01357	0.01503	0.000690827	0.00395543	0.0243654	0.0243842
0.3665	0.00187	0.71361	0.00053	0.00511	0.02235	0.02235	0.000690827	0.00527348	0.0258681	0.0252542
0.23095	0.00139	0.71361	0.0008	0.00511	0.01044	0.00991	0.0008	0.00527348	0.0243654	0.0243842
0.1261	0.00486	1	0.00026	0.00223	0.00605	0.00572	0.000690827	0.00395543	0.0243654	0.0243842
0.23095	0.00327	1	0.00053	0.00284	0.02028	0.02461	0.000690827	0.00395543	0.0250943	0.0262927
0.17851	0.008	1	0.00053	0.00284	0.0116	0.01503	0.000690827	0.00395543	0.0243654	0.0243842
0.09352	0.02686	0.48127	0.00035	0.00284	0.0193	0.00361	0.000690827	0.00395543	0.0247119	0.0243842
0.1261	0.00374	1	0.00046	0.00455	0.00938	0.0089	0.000690827	0.00485592	0.0243654	0.0243842
0.1669	0.00626	0.72211	0.00061	0.00252	0.01747	0.01503	0.000690827	0.00395543	0.0243654	0.0243842
0.32868	0.00427	1	0.0008	0.00284	0.02128	0.02235	0.0008	0.00395543	0.0250943	0.0252542
0.08654	0.00088	0.46107	0.00023	0.00119	0.00938	0.01357	0.000690827	0.00395543	0.0243654	0.0243842
0.07383	0.01591	0.48127	0.0004	0.00135	0.02835	0.00715	0.000690827	0.00395543	0.0296548	0.0243842
0.1907	0.00626	1	0.00061	0.00153	0.0158	0.01101	0.000690827	0.00395543	0.0243654	0.0243842
0.07998	0.00552	1	0.00053	0.00223	0.02461	0.02028	0.000690827	0.00395543	0.0271334	0.0245521
0.13549	0.01138	1	0.00061	0.00361	0.01288	0.01503	0.000690827	0.00424207	0.0243654	0.0243842
0.2035	0.00486	1	0.00026	0.00223	0.0116	0.00511	0.000690827	0.00395543	0.0243654	0.0243842
0.1261	0.01972	0.72211	0.00061	0.00223	0.03572	0.02235	0.000690827	0.00395543	0.0358275	0.0252542
0.11723	0.00708	0.72211	0.00035	0.00197	0.0116	0.00361	0.000690827	0.00395543	0.0243654	0.0243842
0.15588	0.01426	1	0.00046	0.00455	0.00755	0.00572	0.000690827	0.00485592	0.0243654	0.0243842
0.1261	0.00708	1	0.00046	0.0032	0.01288	0.02235	0.000690827	0.00405577	0.0243654	0.0252542
0.10096	0.00427	1	0.00061	0.00455	0.01427	0.01663	0.000690827	0.00485592	0.0243654	0.0243842
0.09352	0.00103	1	0.0002	0.00091	0.0054	0.00361	0.000690827	0.00395543	0.0243654	0.0243842
0.10885	0.00427	1	0.00013	0.00053	0.0158	0.02235	0.000690827	0.00395543	0.0243654	0.0252542
0.10885	0.01275	0.72211	0.0004	0.00252	0.00605	0.00511	0.000690827	0.00395543	0.0243654	0.0243842
0.1261	0.00708	0.48127	0.00061	0.0032	0.00842	0.00511	0.000690827	0.00405577	0.0243654	0.0243842
0.1907	0.00626	0.72211	0.00053	0.0032	0.0258	0.01837	0.000690827	0.00405577	0.0277419	0.0245521
0.10885	0.00187	1	0.00023	0.0007	0.01044	0.0064	0.000690827	0.00395543	0.0243654	0.0243842
0.21691	0.00216	1	0.00061	0.0032	0.01663	0.01223	0.000690827	0.00405577	0.0243654	0.0243842
0.11723	0.00626	0.72211	0.0004	0.0032	0.01044	0.02028	0.000690827	0.00405577	0.0243654	0.0245521
0.06269	0.00552	1	0.00013	0.0007	0.0116	0.02028	0.000690827	0.00395543	0.0243654	0.0245521
0.27688	0.00427	1	0.00046	0.00223	0.0116	0.01223	0.000690827	0.00395543	0.0243654	0.0243842
0.21691	0.01014	0.72211	0.00053	0.0032	0.0116	0.01223	0.000690827	0.00405577	0.0243654	0.0243842
0.13549	0.00374	1	0.0002	0.00197	0.01357	0.01101	0.000690827	0.00395543	0.0243654	0.0243842
0.1907	0.00486	1	0.0007	0.00572	0.01288	0.00715	0.000761697	0.00579534	0.0243654	0.0243842
0.34726	0.00187	0.71361	0.00053	0.00197	0.02235	0.02706	0.000690827	0.00395543	0.0258681	0.0282759
0.1669	0.00626	1	0.00046	0.00119	0.0258	0.0326	0.000690827	0.00395543	0.0277419	0.0330629
0.10096	0.00286	1	0.00046	0.00252	0.01044	0.01223	0.000690827	0.00395543	0.0243654	0.0243842
0.14541	0.00286	1	0.00023	0.00104	0.01837	0.02028	0.000690827	0.00395543	0.0247119	0.0245521
0.13549	0.01138	0.72211	0.0004	0.00361	0.00938	0.00572	0.000690827	0.00424207	0.0243654	0.0243842
0.1669	0.00626	1	0.00026	0.0032	0.00715	0.0089	0.000690827	0.00405577	0.0243654	0.0243842
0.1669	0.00187	1	0.00026	0.00223	0.00842	0.00798	0.000690827	0.00395543	0.0243654	0.0243842
0.15588	0.00427	1	0.0007	0.00455	0.00676	0.01503	0.000761697	0.00485592	0.0243654	0.0243842
0.07383	0.01275	0.72211	0.00023	0.00153	0.01288	0.02028	0.000690827	0.00395543	0.0243654	0.0245521
0.2035	0.00286	1	0.00046	0.00153	0.00938	0.01357	0.000690827	0.00395543	0.0243654	0.0243842
0.06807	0.01014	1	0.00035	0.00174	0.00676	0.00715	0.000690827	0.00395543	0.0243654	0.0243842
0.13549	0.00552	1	0.00046	0.00252	0.0158	0.03572	0.000690827	0.00395543	0.0243654	0.0358275
0.29349	0.00162	0.71361	0.00053	0.00252	0.00842	0.01663	0.000690827	0.00395543	0.0243654	0.0243842
0.24562	0.00626	1	0.0007	0.00511	0.01288	0.00715	0.000761697	0.00527348	0.0243654	0.0243842
0.2035	0.00427	1	0.00046	0.0032	0.02128	0.02028	0.000690827	0.00405577	0.0250943	0.0245521
0.10096	0.00286	1	0.00046	0.00223	0.01503	0.01503	0.000690827	0.00395543	0.0243654	0.0243842
0.17851	0.01773	0.48127	0.00061	0.00572	0.00938	0.0064	0.000690827	0.00579534	0.0243654	0.0243842
0.08654	0.00139	1	0.00031	0.00153	0.01357	0.02461	0.000690827	0.00395543	0.0243654	0.0262927
0.05298	0.00427	0.72211	0.00015	0.00119	0.01288	0.01101	0.000690827	0.00395543	0.0243654	0.0243842
0.1669	0.00374	1	0.00046	0.00223	0.01427	0.00991	0.000690827	0.00395543	0.0243654	0.0243842
0.21691	0.00552	1	0.0004	0.00153	0.0193	0.01837	0.000690827	0.00395543	0.0247119	0.0245521
0.26093	0.00626	1	0.00061	0.00284	0.03572	0.02235	0.000690827	0.00395543	0.0358275	0.0252542
0.1669	0.00249	1	0.0008	0.00406	0.00798	0.0064	0.0008	0.00448619	0.0243654	0.0243842
0.2035	0.00708	1	0.00026	0.00174	0.0116	0.01503	0.000690827	0.00395543	0.0243654	0.0243842
0.29349	0.00216	1	0.0008	0.00455	0.02128	0.01357	0.0008	0.00485592	0.0250943	0.0243842
0.05766	0.00427	1	0.0004	0.00153	0.0116	0.01223	0.000690827	0.00395543	0.0243654	0.0243842
0.17851	0.008	1	0.00053	0.00361	0.0158	0.02706	0.000690827	0.00424207	0.0243654	0.0282759
0.10885	0.00249	1	0.0004	0.00223	0.02706	0.01357	0.000690827	0.00395543	0.0286047	0.0243842
0.26093	0.0219	0.72211	0.0008	0.00284	0.0258	0.02461	0.0008	0.00395543	0.0277419	0.0262927
0.26093	0.00216	1	0.00061	0.00252	0.02461	0.00991	0.000690827	0.00395543	0.0271334	0.0243842
0.17851	0.008	1	0.00061	0.00406	0.0158	0.01357	0.000690827	0.00448619	0.0243654	0.0243842
0.24562	0.00708	1	0.00053	0.00284	0.0116	0.0089	0.000690827	0.00395543	0.0243654	0.0243842
0.11723	0.01773	0.72211	0.00035	0.0032	0.00938	0.0032	0.000690827	0.00405577	0.0243654	0.0243842
0.1261	0.01426	1	0.00046	0.00153	0.01427	0.01663	0.000690827	0.00395543	0.0243654	0.0243842
0.1261	0.01773	1	0.00035	0.00252	0.01427	0.0089	0.000690827	0.00395543	0.0243654	0.0243842
0.1261	0.00374	1	0.0008	0.00455	0.00676	0.01223	0.0008	0.00485592	0.0243654	0.0243842
0.3665	0.01773	1	0.0007	0.0032	0.0258	0.02972	0.000761697	0.00405577	0.0277419	0.0305133
0.07998	0.01972	0.48127	0.00031	0.00223	0.01747	0.01837	0.000690827	0.00395543	0.0243654	0.0245521
0.1669	0.01591	0.72211	0.0008	0.00361	0.02345	0.01223	0.0008	0.00424207	0.0264374	0.0243842
0.32868	0.00552	1	0.0007	0.00455	0.02128	0.02028	0.000761697	0.00485592	0.0250943	0.0245521
0.1261	0.00901	1	0.00046	0.00197	0.02128	0.0089	0.000690827	0.00395543	0.0250943	0.0243842
0.2035	0.00626	1	0.00046	0.00284	0.02128	0.00715	0.000690827	0.00395543	0.0250943	0.0243842
0.26093	0.00286	1	0.00061	0.00223	0.02128	0.01223	0.000690827	0.00395543	0.0250943	0.0243842
0.08654	0.00249	1	0.00017	0.0007	0.00755	0.01503	0.000690827	0.00395543	0.0243654	0.0243842
0.09352	0.00327	1	0.00026	0.00119	0.01044	0.01357	0.000690827	0.00395543	0.0243654	0.0243842
0.06269	0.00216	0.72211	0.00015	0.00135	0.00991	0.0089	0.000690827	0.00395543	0.0243654	0.0243842
0.17851	0.00626	1	0.0008	0.00361	0.0116	0.0089	0.0008	0.00424207	0.0243654	0.0243842
0.29349	0.00552	1	0.0008	0.00455	0.02235	0.01101	0.0008	0.00485592	0.0258681	0.0243842
0.2035	0.00187	1	0.00031	0.00223	0.0158	0.00798	0.000690827	0.00395543	0.0243654	0.0243842
0.27688	0.00249	1	0.00026	0.00223	0.01223	0.01223	0.000690827	0.00395543	0.0243654	0.0243842
0.2035	0.00626	1	0.00061	0.00197	0.0193	0.02461	0.000690827	0.00395543	0.0247119	0.0262927
0.1669	0.00216	1	0.00017	0.0007	0.0158	0.01357	0.000690827	0.00395543	0.0243654	0.0243842
0.06269	0.00427	1	0.00053	0.0032	0.01747	0.01101	0.000690827	0.00405577	0.0243654	0.0243842
0.05766	0.00216	1	0.00017	0.0007	0.00991	0.01503	0.000690827	0.00395543	0.0243654	0.0243842
0.32868	0.00486	1	0.00046	0.00252	0.01747	0.0326	0.000690827	0.00395543	0.0243654	0.0330629
0.1669	0.0012	1	0.00026	0.00197	0.0064	0.01503	0.000690827	0.00395543	0.0243654	0.0243842
0.11723	0.00327	0.72211	0.00031	0.0008	0.0158	0.00991	0.000690827	0.00395543	0.0243654	0.0243842
0.09352	0.00187	1	0.00015	0.0007	0.01663	0.01101	0.000690827	0.00395543	0.0243654	0.0243842
0.13549	0.00552	1	0.00061	0.00572	0.00938	0.00455	0.000690827	0.00579534	0.0243654	0.0243842
0.11723	0.00486	1	0.00035	0.00197	0.01747	0.02028	0.000690827	0.00395543	0.0243654	0.0245521
0.13549	0.00286	1	0.0004	0.00174	0.02128	0.01357	0.000690827	0.00395543	0.0250943	0.0243842
0.2035	0.01773	1	0.00046	0.0032	0.02128	0.0089	0.000690827	0.00405577	0.0250943	0.0243842
0.42808	0.00626	1	0.0008	0.00361	0.02972	0.03572	0.0008	0.00424207	0.0306076	0.0358275
0.44988	0.00374	0.46107	0.0007	0.00406	0.02461	0.02461	0.000761697	0.00448619	0.0271334	0.0262927
0.1261	0.01275	0.72211	0.00046	0.00197	0.0116	0.01837	0.000690827	0.00395543	0.0243654	0.0245521
0.05766	0.00216	1	0.00017	0.00119	0.0043	0.0064	0.000690827	0.00395543	0.0243654	0.0243842
0.08654	0.00427	1	0.00035	0.00153	0.00755	0.00991	0.000690827	0.00395543	0.0243654	0.0243842
0.1907	0.01138	0.72211	0.00035	0.00406	0.0158	0.01223	0.000690827	0.00448619	0.0243654	0.0243842
0.2035	0.008	0.48127	0.00035	0.00223	0.00938	0.01503	0.000690827	0.00395543	0.0243654	0.0243842
0.10096	0.00901	1	0.00031	0.00091	0.03112	0.03572	0.000690827	0.00395543	0.0317227	0.0358275
0.10885	0.00327	1	0.00023	0.00061	0.02461	0.02706	0.000690827	0.00395543	0.0271334	0.0282759
0.2035	0.00901	0.72211	0.00046	0.00174	0.0116	0.02235	0.000690827	0.00395543	0.0243654	0.0252542
0.09352	0.00486	1	0.00046	0.00284	0.01503	0.01663	0.000690827	0.00395543	0.0243654	0.0243842
0.14541	0.00427	1	0.00015	0.0008	0.01427	0.00715	0.000690827	0.00395543	0.0243654	0.0243842
0.24562	0.00088	1	0.00031	0.00153	0.02706	0.02235	0.000690827	0.00395543	0.0286047	0.0252542
0.10096	0.00374	1	0.0002	0.00197	0.0089	0.00572	0.000690827	0.00395543	0.0243654	0.0243842
0.13549	0.00708	1	0.00026	0.00119	0.01101	0.01357	0.000690827	0.00395543	0.0243654	0.0243842
0.24562	0.00901	1	0.00046	0.00174	0.0193	0.02235	0.000690827	0.00395543	0.0247119	0.0252542
0.08654	0.00286	1	0.00031	0.00135	0.01044	0.00991	0.000690827	0.00395543	0.0243654	0.0243842
0.09352	0.008	0.72211	0.00023	0.00197	0.01663	0.01503	0.000690827	0.00395543	0.0243654	0.0243842
0.14541	0.00327	1	0.0007	0.00406	0.00842	0.0089	0.000761697	0.00448619	0.0243654	0.0243842
0.27688	0.00187	1	0.00061	0.0032	0.02461	0.01837	0.000690827	0.00405577	0.0271334	0.0245521
0.10885	0.00327	1	0.0004	0.00153	0.0158	0.02028	0.000690827	0.00395543	0.0243654	0.0245521
0.13549	0.00552	1	0.0004	0.00197	0.01503	0.01101	0.000690827	0.00395543	0.0243654	0.0243842
0.13549	0.01591	0.72211	0.0008	0.00455	0.01747	0.01223	0.0008	0.00485592	0.0243654	0.0243842
0.17851	0.00216	1	0.00023	0.00135	0.01503	0.01663	0.000690827	0.00395543	0.0243654	0.0243842
0.1261	0.00552	1	0.00031	0.00153	0.02128	0.02028	0.000690827	0.00395543	0.0250943	0.0245521
0.10096	0.00708	1	0.00046	0.00174	0.01427	0.01837	0.000690827	0.00395543	0.0243654	0.0245521
0.17851	0.00286	1	0.00061	0.00361	0.01044	0.01663	0.000690827	0.00424207	0.0243654	0.0243842
0.13549	0.00901	1	0.0004	0.00252	0.02028	0.01503	0.000690827	0.00395543	0.0250943	0.0243842
0.13549	0.01014	0.72211	0.0004	0.00252	0.0258	0.0089	0.000690827	0.00395543	0.0277419	0.0243842
0.1261	0.01275	1	0.00046	0.00223	0.00842	0.0089	0.000690827	0.00395543	0.0243654	0.0243842
0.17851	0.00486	1	0.0004	0.00223	0.00938	0.01503	0.000690827	0.00395543	0.0243654	0.0243842
0.13549	0.00427	0.72211	0.00061	0.00361	0.00842	0.00991	0.000690827	0.00424207	0.0243654	0.0243842
0.21691	0.00901	1	0.00061	0.00223	0.03572	0.03572	0.000690827	0.00395543	0.0358275	0.0358275
0.14541	0.00374	1	0.0008	0.00361	0.01663	0.01663	0.0008	0.00424207	0.0243654	0.0243842
0.09352	0.00286	1	0.0002	0.0008	0.0193	0.01837	0.000690827	0.00395543	0.0247119	0.0245521
0.15588	0.01591	0.48127	0.00046	0.00223	0.0193	0.02461	0.000690827	0.00395543	0.0247119	0.0262927
0.17851	0.01426	0.72211	0.00061	0.0032	0.02461	0.01503	0.000690827	0.00405577	0.0271334	0.0243842
0.07998	0.00327	1	0.00017	0.00104	0.01503	0.00715	0.000690827	0.00395543	0.0243654	0.0243842
0.06807	0.00187	1	0.00023	0.00119	0.00605	0.00991	0.000690827	0.00395543	0.0243654	0.0243842
0.13549	0.00216	1	0.00061	0.00284	0.00938	0.01101	0.000690827	0.00395543	0.0243654	0.0243842
0.07383	0.00286	1	0.00046	0.00252	0.00676	0.00455	0.000690827	0.00395543	0.0243654	0.0243842
0.10885	0.00374	1	0.0004	0.00223	0.0054	0.0089	0.000690827	0.00395543	0.0243654	0.0243842
0.42808	0.00374	1	0.0007	0.00284	0.0193	0.01837	0.000761697	0.00395543	0.0247119	0.0245521
0.05766	0.00327	1	0.0004	0.00174	0.01044	0.01663	0.000690827	0.00395543	0.0243654	0.0243842
0.10096	0.00626	1	0.00046	0.00174	0.02128	0.0089	0.000690827	0.00395543	0.0250943	0.0243842
0.1669	0.00187	1	0.0002	0.00252	0.00605	0.02235	0.000690827	0.00395543	0.0243654	0.0252542
0.2035	0.00249	1	0.00046	0.00174	0.01044	0.02706	0.000690827	0.00395543	0.0243654	0.0282759
0.15588	0.01014	0.72211	0.00061	0.00284	0.01288	0.00715	0.000690827	0.00395543	0.0243654	0.0243842
0.13549	0.00552	1	0.00061	0.00223	0.0158	0.00715	0.000690827	0.00395543	0.0243654	0.0243842
0.24562	0.00427	1	0.0008	0.00511	0.02972	0.03909	0.0008	0.00527348	0.0306076	0.0391291
0.1261	0.00374	0.71361	0.0002	0.00223	0.00755	0.01663	0.000690827	0.00395543	0.0243654	0.0243842
0.1261	0.00552	1	0.00031	0.00197	0.00755	0.01503	0.000690827	0.00395543	0.0243654	0.0243842
0.21691	0.01014	0.72211	0.00061	0.00361	0.02028	0.01223	0.000690827	0.00424207	0.0250943	0.0243842
0.14541	0.00901	1	0.00035	0.00197	0.00842	0.01101	0.000690827	0.00395543	0.0243654	0.0243842
0.11723	0.00075	0.71361	0.00017	0.0008	0.01503	0.02235	0.000690827	0.00395543	0.0243654	0.0252542
0.27688	0.00427	1	0.00061	0.00284	0.02345	0.02235	0.000690827	0.00395543	0.0264374	0.0252542
0.14541	0.00552	1	0.00023	0.00153	0.01427	0.01223	0.000690827	0.00395543	0.0243654	0.0243842
0.14541	0.00427	0.72211	0.00023	0.00104	0.02461	0.01503	0.000690827	0.00395543	0.0271334	0.0243842
0.24562	0.00162	1	0.00026	0.00153	0.01101	0.01357	0.000690827	0.00395543	0.0243654	0.0243842
0.15588	0.00708	1	0.00031	0.00197	0.0193	0.00572	0.000690827	0.00395543	0.0247119	0.0243842
0.10096	0.00327	1	0.00031	0.0008	0.01427	0.02028	0.000690827	0.00395543	0.0243654	0.0245521
0.24562	0.00552	1	0.00031	0.00197	0.01288	0.01503	0.000690827	0.00395543	0.0243654	0.0243842
0.21691	0.00286	1	0.0004	0.00284	0.01427	0.01663	0.000690827	0.00395543	0.0243654	0.0243842
0.07383	0.00626	1	0.00046	0.00223	0.00842	0.00715	0.000690827	0.00395543	0.0243654	0.0243842
0.06807	0.00286	1	0.00023	0.00135	0.01427	0.01357	0.000690827	0.00395543	0.0243654	0.0243842
0.08654	0.01138	0.72211	0.00035	0.00223	0.00755	0.00572	0.000690827	0.00395543	0.0243654	0.0243842
0.17851	0.00552	1	0.00053	0.00252	0.02972	0.0089	0.000690827	0.00395543	0.0306076	0.0243842
0.13549	0.008	1	0.00061	0.00252	0.0158	0.02235	0.000690827	0.00395543	0.0243654	0.0252542
0.14541	0.00249	1	0.00031	0.00174	0.01288	0.01837	0.000690827	0.00395543	0.0243654	0.0245521
0.21691	0.01591	0.72211	0.00061	0.00252	0.0193	0.01101	0.000690827	0.00395543	0.0247119	0.0243842
0.07998	0.00708	1	0.00035	0.00223	0.0054	0.00715	0.000690827	0.00395543	0.0243654	0.0243842
0.1261	0.00374	1	0.0002	0.00153	0.01503	0.01101	0.000690827	0.00395543	0.0243654	0.0243842
0.07998	0.01426	0.48127	0.0004	0.00197	0.01747	0.00798	0.000690827	0.00395543	0.0243654	0.0243842
0.05766	0.01138	1	0.00023	0.0008	0.02128	0.02028	0.000690827	0.00395543	0.0250943	0.0245521
0.13549	0.00486	0.72211	0.00031	0.00153	0.02128	0.01503	0.000690827	0.00395543	0.0250943	0.0243842
0.2035	0.00162	1	0.0002	0.00223	0.00676	0.01663	0.000690827	0.00395543	0.0243654	0.0243842
0.1669	0.01426	1	0.00035	0.00197	0.0158	0.02028	0.000690827	0.00395543	0.0243654	0.0245521
0.06807	0.00249	1	9e-05	0.00061	0.0043	0.00991	0.000690827	0.00395543	0.0243654	0.0243842
0.17851	0.00901	1	0.0004	0.00197	0.01427	0.02028	0.000690827	0.00395543	0.0243654	0.0245521
0.06807	0.008	1	0.00046	0.00197	0.00755	0.00511	0.000690827	0.00395543	0.0243654	0.0243842
0.10096	0.00374	0.72211	0.00061	0.00252	0.00938	0.01101	0.000690827	0.00395543	0.0243654	0.0243842
0.08654	0.00216	1	0.00011	0.00053	0.01044	0.01503	0.000690827	0.00395543	0.0243654	0.0243842
0.23095	0.00327	1	0.00061	0.00406	0.01223	0.02706	0.000690827	0.00448619	0.0243654	0.0282759
0.10096	0.00216	1	0.00061	0.00284	0.00605	0.00455	0.000690827	0.00395543	0.0243654	0.0243842
0.10096	0.01138	0.48127	0.00031	0.00197	0.02128	0.01223	0.000690827	0.00395543	0.0250943	0.0243842
0.10096	0.00486	1	0.00046	0.00223	0.00676	0.01101	0.000690827	0.00395543	0.0243654	0.0243842
0.2035	0.01014	1	0.0007	0.0064	0.0158	0.02461	0.000761697	0.00640641	0.0243654	0.0262927
0.14541	0.00486	1	0.00061	0.00406	0.01837	0.01503	0.000690827	0.00448619	0.0247119	0.0243842
0.27688	0.00327	1	0.0008	0.00511	0.0158	0.00991	0.0008	0.00527348	0.0243654	0.0243842
0.10885	0.00374	1	0.00061	0.00406	0.01747	0.01503	0.000690827	0.00448619	0.0243654	0.0243842
0.15588	0.00552	1	0.00061	0.0032	0.01288	0.00572	0.000690827	0.00405577	0.0243654	0.0243842
0.11723	0.00708	1	0.00023	0.00091	0.01288	0.00991	0.000690827	0.00395543	0.0243654	0.0243842
0.13549	0.00901	0.48127	0.0004	0.00174	0.0258	0.01101	0.000690827	0.00395543	0.0277419	0.0243842
0.08654	0.00162	1	0.00031	0.00174	0.0116	0.0032	0.000690827	0.00395543	0.0243654	0.0243842
0.27688	0.01138	0.72211	0.00061	0.00406	0.02128	0.01663	0.000690827	0.00448619	0.0250943	0.0243842
0.13549	0.00216	1	0.00013	0.0007	0.01288	0.01357	0.000690827	0.00395543	0.0243654	0.0243842
0.21691	0.00286	1	0.00061	0.00284	0.02972	0.01837	0.000690827	0.00395543	0.0306076	0.0245521
0.17851	0.00327	1	0.0008	0.00361	0.01044	0.01837	0.0008	0.00424207	0.0243654	0.0245521
0.10096	0.00626	1	0.0002	0.00135	0.01503	0.0089	0.000690827	0.00395543	0.0243654	0.0243842
0.21691	0.01138	0.72211	0.00053	0.00252	0.0326	0.02235	0.000690827	0.00395543	0.0330629	0.0252542
0.13549	0.00708	1	0.00053	0.00174	0.00938	0.00511	0.000690827	0.00395543	0.0243654	0.0243842
0.07998	0.00626	1	0.00053	0.00252	0.01288	0.01223	0.000690827	0.00395543	0.0243654	0.0243842
0.10885	0.0012	1	0.00046	0.00197	0.00605	0.01101	0.000690827	0.00395543	0.0243654	0.0243842
0.26093	0.00216	1	0.00061	0.00361	0.02028	0.0326	0.000690827	0.00424207	0.0250943	0.0330629
0.13549	0.01138	1	0.00061	0.00361	0.0116	0.01503	0.000690827	0.00424207	0.0243654	0.0243842
0.11723	0.00626	1	0.00035	0.00223	0.00755	0.00798	0.000690827	0.00395543	0.0243654	0.0243842
0.1261	0.00626	1	0.00046	0.0032	0.01503	0.02461	0.000690827	0.00405577	0.0243654	0.0262927
0.1261	0.00552	1	0.00046	0.00135	0.0158	0.0089	0.000690827	0.00395543	0.0243654	0.0243842
0.15588	0.00286	1	0.00031	0.00223	0.01747	0.01503	0.000690827	0.00395543	0.0243654	0.0243842
0.09352	0.00708	1	0.00061	0.00252	0.01223	0.00572	0.000690827	0.00395543	0.0243654	0.0243842
0.08654	0.01014	0.72211	0.0004	0.00252	0.01747	0.0089	0.000690827	0.00395543	0.0243654	0.0243842
0.21691	0.008	1	0.00017	0.00119	0.01427	0.00991	0.000690827	0.00395543	0.0243654	0.0243842
0.17851	0.00486	1	0.0004	0.00174	0.0193	0.01101	0.000690827	0.00395543	0.0247119	0.0243842
0.2035	0.01138	1	0.0007	0.00572	0.01747	0.01101	0.000761697	0.00579534	0.0243654	0.0243842
0.29349	0.008	1	0.0008	0.00511	0.02835	0.01503	0.0008	0.00527348	0.0296548	0.0243842
0.1261	0.00327	1	0.00046	0.00174	0.01044	0.01663	0.000690827	0.00395543	0.0243654	0.0243842
0.2035	0.01972	0.72211	0.00035	0.00223	0.02128	0.01503	0.000690827	0.00395543	0.0250943	0.0243842
0.1907	0.00286	1	0.00023	0.00197	0.00938	0.00715	0.000690827	0.00395543	0.0243654	0.0243842
0.15588	0.00626	0.48127	0.00046	0.00252	0.01288	0.01503	0.000690827	0.00395543	0.0243654	0.0243842
0.1261	0.00286	1	0.00031	0.00135	0.02461	0.00991	0.000690827	0.00395543	0.0271334	0.0243842
0.21691	0.00486	1	0.00046	0.00284	0.02128	0.02028	0.000690827	0.00395543	0.0250943	0.0245521
0.23095	0.00486	1	0.00035	0.00153	0.0158	0.0089	0.000690827	0.00395543	0.0243654	0.0243842
0.15588	0.008	1	0.00023	0.00135	0.02128	0.01223	0.000690827	0.00395543	0.0250943	0.0243842
0.1907	0.01275	1	0.0004	0.00361	0.01427	0.02461	0.000690827	0.00424207	0.0243654	0.0262927
0.1261	0.00626	0.72211	0.00031	0.00091	0.0116	0.00991	0.000690827	0.00395543	0.0243654	0.0243842
0.1669	0.00901	0.72211	0.00061	0.00361	0.01503	0.02461	0.000690827	0.00424207	0.0243654	0.0262927
0.13549	0.008	1	0.0004	0.00197	0.03112	0.01357	0.000690827	0.00395543	0.0317227	0.0243842
0.14541	0.00552	1	0.00053	0.0032	0.00842	0.01663	0.000690827	0.00405577	0.0243654	0.0243842
0.1669	0.00088	0.71361	0.00061	0.00284	0.01044	0.01837	0.000690827	0.00395543	0.0243654	0.0245521
0.11723	0.00286	1	0.00053	0.00284	0.01503	0.00715	0.000690827	0.00395543	0.0243654	0.0243842
0.21691	0.00626	0.72211	0.00035	0.00135	0.0158	0.0089	0.000690827	0.00395543	0.0243654	0.0243842
0.29349	0.01275	1	0.00053	0.00361	0.01101	0.01663	0.000690827	0.00424207	0.0243654	0.0243842
0.15588	0.00427	1	0.00035	0.00223	0.01427	0.02235	0.000690827	0.00395543	0.0243654	0.0252542
0.31076	0.01426	0.48127	0.00061	0.00406	0.01288	0.01663	0.000690827	0.00448619	0.0243654	0.0243842
0.1669	0.00249	1	0.00026	0.00223	0.01427	0.00991	0.000690827	0.00395543	0.0243654	0.0243842
0.24562	0.008	1	0.0007	0.0064	0.01663	0.00798	0.000761697	0.00640641	0.0243654	0.0243842
0.3665	0.00901	0.72211	0.00061	0.00223	0.02706	0.01357	0.000690827	0.00395543	0.0286047	0.0243842
0.1261	0.00626	0.72211	0.00061	0.0032	0.01357	0.02461	0.000690827	0.00405577	0.0243654	0.0262927
0.14541	0.00626	0.72211	0.00031	0.00135	0.02461	0.01503	0.000690827	0.00395543	0.0271334	0.0243842
0.11723	0.00103	1	0.00015	0.00091	0.01223	0.01223	0.000690827	0.00395543	0.0243654	0.0243842
0.29349	0.00901	0.72211	0.0008	0.00572	0.0258	0.0326	0.0008	0.00579534	0.0277419	0.0330629
0.27688	0.00187	1	0.00061	0.00511	0.02706	0.04664	0.000690827	0.00527348	0.0286047	0.04664
0.17851	0.01591	1	0.0008	0.00511	0.02461	0.02461	0.0008	0.00527348	0.0271334	0.0262927
0.07383	0.00286	1	0.0002	0.00119	0.01223	0.00715	0.000690827	0.00395543	0.0243654	0.0243842
0.1669	0.00552	0.72211	0.00046	0.00153	0.01288	0.02706	0.000690827	0.00395543	0.0243654	0.0282759
0.17851	0.0219	0.48127	0.0008	0.00511	0.0258	0.01101	0.0008	0.00527348	0.0277419	0.0243842
0.21691	0.00552	1	0.00046	0.00174	0.0158	0.01663	0.000690827	0.00395543	0.0243654	0.0243842
0.1907	0.01773	0.48127	0.00046	0.00284	0.01288	0.01223	0.000690827	0.00395543	0.0243654	0.0243842
0.15588	0.00216	1	0.00035	0.00197	0.00842	0.02235	0.000690827	0.00395543	0.0243654	0.0252542
0.17851	0.00216	1	0.00061	0.00197	0.01427	0.02461	0.000690827	0.00395543	0.0243654	0.0262927
0.09352	0.00486	1	0.00015	0.00061	0.0116	0.00991	0.000690827	0.00395543	0.0243654	0.0243842
0.15588	0.00626	1	0.00023	0.00135	0.0193	0.02461	0.000690827	0.00395543	0.0247119	0.0262927
0.23095	0.01275	1	0.00046	0.00252	0.01747	0.01357	0.000690827	0.00395543	0.0243654	0.0243842
0.15588	0.00486	0.72211	0.00046	0.00223	0.01503	0.01503	0.000690827	0.00395543	0.0243654	0.0243842
0.27688	0.00103	0.71361	0.00026	0.00174	0.01288	0.01663	0.000690827	0.00395543	0.0243654	0.0243842
0.14541	0.01014	1	0.00053	0.00284	0.0116	0.01223	0.000690827	0.00395543	0.0243654	0.0243842
0.17851	0.00901	0.72211	0.00046	0.00197	0.0193	0.02235	0.000690827	0.00395543	0.0247119	0.0252542
0.1907	0.01014	1	0.00053	0.0064	0.0116	0.00991	0.000690827	0.00640641	0.0243654	0.0243842
0.10096	0.00708	1	0.00013	0.00104	0.01288	0.01223	0.000690827	0.00395543	0.0243654	0.0243842
0.15588	0.00249	1	0.00046	0.00104	0.01044	0.02235	0.000690827	0.00395543	0.0243654	0.0252542
0.13549	0.008	1	0.00017	0.0008	0.01044	0.01837	0.000690827	0.00395543	0.0243654	0.0245521
0.06807	0.00286	1	0.00015	0.0008	0.01044	0.00572	0.000690827	0.00395543	0.0243654	0.0243842
0.23095	0.00486	1	0.0008	0.00511	0.01663	0.01223	0.0008	0.00527348	0.0243654	0.0243842
0.14541	0.01275	0.72211	0.00053	0.0032	0.01837	0.02461	0.000690827	0.00405577	0.0247119	0.0262927
0.10885	0.01773	0.72211	0.00031	0.00174	0.0258	0.02235	0.000690827	0.00395543	0.0277419	0.0252542
0.13549	0.00552	1	0.0002	0.00135	0.00755	0.01503	0.000690827	0.00395543	0.0243654	0.0243842
0.10096	0.008	1	0.0004	0.00119	0.01747	0.01503	0.000690827	0.00395543	0.0243654	0.0243842
0.15588	0.00286	1	0.00031	0.00252	0.02128	0.00798	0.000690827	0.00395543	0.0250943	0.0243842
0.08654	0.00187	1	0.00017	0.0008	0.0158	0.01503	0.000690827	0.00395543	0.0243654	0.0243842
0.10885	0.00552	1	0.00015	0.0008	0.00755	0.01357	0.000690827	0.00395543	0.0243654	0.0243842
0.1261	0.01591	0.48127	0.0004	0.00223	0.0158	0.02235	0.000690827	0.00395543	0.0243654	0.0252542
0.1907	0.00901	1	0.00035	0.0032	0.01747	0.01503	0.000690827	0.00405577	0.0243654	0.0243842
0.08654	0.00427	0.72211	0.0002	0.00104	0.0158	0.00361	0.000690827	0.00395543	0.0243654	0.0243842
0.14541	0.00327	0.72211	0.00017	0.00104	0.00676	0.01101	0.000690827	0.00395543	0.0243654	0.0243842
0.10885	0.00901	1	0.0004	0.00284	0.00755	0.01223	0.000690827	0.00395543	0.0243654	0.0243842
0.1669	0.008	1	0.00061	0.00511	0.02706	0.01101	0.000690827	0.00527348	0.0286047	0.0243842
0.2035	0.008	1	0.00061	0.00197	0.01747	0.00798	0.000690827	0.00395543	0.0243654	0.0243842
0.1669	0.00901	1	0.00046	0.00406	0.02128	0.02461	0.000690827	0.00448619	0.0250943	0.0262927
0.09352	0.01138	1	0.0002	0.00174	0.01288	0.01837	0.000690827	0.00395543	0.0243654	0.0245521
0.2035	0.01138	1	0.00046	0.00197	0.02345	0.03572	0.000690827	0.00395543	0.0264374	0.0358275
0.15588	0.00486	1	0.00046	0.00284	0.01044	0.01357	0.000690827	0.00395543	0.0243654	0.0243842
0.07998	0.00427	0.72211	0.00031	0.00223	0.0116	0.0064	0.000690827	0.00395543	0.0243654	0.0243842
0.15588	0.00552	1	0.00046	0.00252	0.01427	0.01101	0.000690827	0.00395543	0.0243654	0.0243842
0.1907	0.00708	1	0.00035	0.00252	0.01288	0.02028	0.000690827	0.00395543	0.0243654	0.0245521
0.27688	0.01773	1	0.00053	0.00223	0.01288	0.01101	0.000690827	0.00395543	0.0243654	0.0243842
0.15588	0.01138	0.72211	0.00046	0.00174	0.0116	0.0089	0.000690827	0.00395543	0.0243654	0.0243842
0.17851	0.00162	0.71361	0.0007	0.00361	0.00482	0.00798	0.000761697	0.00424207	0.0243654	0.0243842
0.13549	0.00162	1	0.0004	0.00104	0.01427	0.01223	0.000690827	0.00395543	0.0243654	0.0243842
0.05298	0.00249	1	0.00015	0.00091	0.0116	0.0064	0.000690827	0.00395543	0.0243654	0.0243842
0.06807	0.00552	1	0.00013	0.00061	0.00676	0.00455	0.000690827	0.00395543	0.0243654	0.0243842
0.11723	0.01591	1	0.00053	0.00284	0.0116	0.0089	0.000690827	0.00395543	0.0243654	0.0243842
0.13549	0.01972	0.72211	0.00061	0.00361	0.02835	0.02706	0.000690827	0.00424207	0.0296548	0.0282759
0.13549	0.00486	1	0.00046	0.00223	0.0116	0.02461	0.000690827	0.00395543	0.0243654	0.0262927
0.10096	0.00626	0.72211	0.00031	0.00223	0.0193	0.01837	0.000690827	0.00395543	0.0247119	0.0245521
0.34726	0.00901	1	0.0004	0.0032	0.01288	0.02028	0.000690827	0.00405577	0.0243654	0.0245521
0.06269	0.01972	0.48127	0.0004	0.00252	0.02128	0.0089	0.000690827	0.00395543	0.0250943	0.0243842
0.09352	0.00187	1	0.00046	0.00197	0.0089	0.00715	0.000690827	0.00395543	0.0243654	0.0243842
0.07383	0.00626	1	0.0004	0.00135	0.02128	0.01663	0.000690827	0.00395543	0.0250943	0.0243842
0.13549	0.00552	1	0.0008	0.00406	0.01288	0.0089	0.0008	0.00448619	0.0243654	0.0243842
0.2035	0.00552	0.72211	0.00046	0.00174	0.0158	0.02461	0.000690827	0.00395543	0.0243654	0.0262927
0.13549	0.00486	1	0.00061	0.00252	0.01288	0.01837	0.000690827	0.00395543	0.0243654	0.0245521
0.10096	0.00901	1	0.0008	0.00406	0.0158	0.00798	0.0008	0.00448619	0.0243654	0.0243842
0.42808	0.00427	1	0.0008	0.00511	0.02345	0.01837	0.0008	0.00527348	0.0264374	0.0245521
0.10885	0.01014	0.72211	0.00061	0.0032	0.01747	0.00572	0.000690827	0.00405577	0.0243654	0.0243842
0.1669	0.01014	0.48127	0.00031	0.00153	0.02128	0.02028	0.000690827	0.00395543	0.0250943	0.0245521
0.05298	0.00486	1	0.00031	0.00135	0.00676	0.01223	0.000690827	0.00395543	0.0243654	0.0243842
0.32868	0.00901	0.48127	0.00061	0.00406	0.0258	0.02028	0.000690827	0.00448619	0.0277419	0.0245521
0.1261	0.00626	1	0.00061	0.00284	0.00938	0.0089	0.000690827	0.00395543	0.0243654	0.0243842
0.06807	0.00374	1	0.00061	0.00284	0.00755	0.00572	0.000690827	0.00395543	0.0243654	0.0243842
0.26093	0.00216	1	0.00046	0.00252	0.01837	0.03572	0.000690827	0.00395543	0.0247119	0.0358275
0.13549	0.00216	1	0.0004	0.00406	0.01427	0.00715	0.000690827	0.00448619	0.0243654	0.0243842
0.1669	0.02967	0.296	0.00046	0.00406	0.01427	0.0089	0.000690827	0.00448619	0.0243654	0.0243842
0.11723	0.01138	1	0.0004	0.00223	0.03112	0.02461	0.000690827	0.00395543	0.0317227	0.0262927
0.1261	0.00374	1	0.00046	0.00197	0.0116	0.02235	0.000690827	0.00395543	0.0243654	0.0252542
0.15588	0.00626	1	0.00053	0.00572	0.00938	0.00455	0.000690827	0.00579534	0.0243654	0.0243842
0.13549	0.00374	1	0.0004	0.00174	0.02028	0.00991	0.000690827	0.00395543	0.0250943	0.0243842
0.09352	0.00187	1	0.0002	0.00104	0.01288	0.01223	0.000690827	0.00395543	0.0243654	0.0243842
0.11723	0.00427	1	0.00023	0.00153	0.01427	0.02461	0.000690827	0.00395543	0.0243654	0.0262927
0.14541	0.00552	1	0.0002	0.00135	0.01288	0.01101	0.000690827	0.00395543	0.0243654	0.0243842
0.24562	0.01591	0.72211	0.0007	0.00455	0.01747	0.0089	0.000761697	0.00485592	0.0243654	0.0243842
0.09352	0.008	0.72211	0.00017	0.00091	0.00938	0.01503	0.000690827	0.00395543	0.0243654	0.0243842
0.34726	0.00901	0.48127	0.0008	0.00455	0.02972	0.01837	0.0008	0.00485592	0.0306076	0.0245521
0.13549	0.01275	1	0.00053	0.00197	0.0193	0.00991	0.000690827	0.00395543	0.0247119	0.0243842
0.10885	0.00249	1	0.00053	0.00361	0.00991	0.00361	0.000690827	0.00424207	0.0243654	0.0243842
0.1669	0.00552	1	0.00061	0.00223	0.01837	0.01503	0.000690827	0.00395543	0.0247119	0.0243842
0.10885	0.0219	0.296	0.00035	0.00153	0.01288	0.02235	0.000690827	0.00395543	0.0243654	0.0252542
0.1907	0.00486	1	0.00053	0.00284	0.00842	0.01223	0.000690827	0.00395543	0.0243654	0.0243842
0.08654	0.00075	1	0.00017	0.0008	0.01044	0.00991	0.000690827	0.00395543	0.0243654	0.0243842
0.15588	0.00249	0.71361	0.00053	0.00223	0.01427	0.01663	0.000690827	0.00395543	0.0243654	0.0243842
0.07998	0.00708	1	0.0004	0.00223	0.01288	0.00715	0.000690827	0.00395543	0.0243654	0.0243842
0.17851	0.00626	1	0.00053	0.00252	0.00676	0.0089	0.000690827	0.00395543	0.0243654	0.0243842
0.31076	0.01138	0.48127	0.00061	0.00406	0.0158	0.01503	0.000690827	0.00448619	0.0243654	0.0243842
0.2035	0.00427	1	0.00046	0.0032	0.01357	0.02028	0.000690827	0.00405577	0.0243654	0.0245521
0.17851	0.01275	0.72211	0.00035	0.00197	0.01747	0.01663	0.000690827	0.00395543	0.0243654	0.0243842
0.1669	0.01014	0.72211	0.00061	0.00284	0.0193	0.01223	0.000690827	0.00395543	0.0247119	0.0243842
0.10885	0.00216	1	0.00017	0.00053	0.01427	0.01503	0.000690827	0.00395543	0.0243654	0.0243842
0.2035	0.01138	0.48127	0.00046	0.0032	0.01747	0.02028	0.000690827	0.00405577	0.0243654	0.0245521
0.13549	0.00427	1	0.0004	0.00197	0.0193	0.02028	0.000690827	0.00395543	0.0247119	0.0245521
0.1669	0.00286	1	0.0002	0.00153	0.01663	0.02235	0.000690827	0.00395543	0.0243654	0.0252542
0.2035	0.00427	1	0.00053	0.00511	0.0089	0.00798	0.000690827	0.00527348	0.0243654	0.0243842
0.13549	0.00139	1	0.00061	0.0032	0.0089	0.01101	0.000690827	0.00405577	0.0243654	0.0243842
0.06807	0.01426	0.48127	0.00046	0.00197	0.01427	0.00991	0.000690827	0.00395543	0.0243654	0.0243842
0.1669	0.00216	1	0.00046	0.0032	0.01101	0.01837	0.000690827	0.00405577	0.0243654	0.0245521
0.17851	0.00486	1	0.00035	0.00174	0.0116	0.01357	0.000690827	0.00395543	0.0243654	0.0243842
0.08654	0.01426	1	0.00053	0.00252	0.01747	0.01223	0.000690827	0.00395543	0.0243654	0.0243842
0.1907	0.00708	1	0.00035	0.00174	0.0258	0.00991	0.000690827	0.00395543	0.0277419	0.0243842
0.32868	0.00286	1	0.00061	0.00361	0.0116	0.01837	0.000690827	0.00424207	0.0243654	0.0245521
0.2035	0.008	0.72211	0.00046	0.00223	0.01503	0.02028	0.000690827	0.00395543	0.0243654	0.0245521
0.05298	0.01426	0.72211	0.0004	0.00197	0.00842	0.00511	0.000690827	0.00395543	0.0243654	0.0243842
0.1669	0.00427	1	0.00061	0.00223	0.01427	0.01101	0.000690827	0.00395543	0.0243654	0.0243842
0.17851	0.01138	0.72211	0.00035	0.00361	0.01223	0.0089	0.000690827	0.00424207	0.0243654	0.0243842
0.26093	0.00286	1	0.0008	0.00284	0.0193	0.02028	0.0008	0.00395543	0.0247119	0.0245521
0.38639	0.00486	1	0.0007	0.00572	0.02128	0.01837	0.000761697	0.00579534	0.0250943	0.0245521
0.21691	0.00626	1	0.00061	0.00361	0.01427	0.02461	0.000690827	0.00424207	0.0243654	0.0262927
0.10885	0.008	1	0.00053	0.00361	0.01288	0.01357	0.000690827	0.00424207	0.0243654	0.0243842
0.10885	0.00552	1	0.00017	0.00091	0.00676	0.00991	0.000690827	0.00395543	0.0243654	0.0243842
0.21691	0.00103	1	0.00061	0.00223	0.01503	0.02235	0.000690827	0.00395543	0.0243654	0.0252542
0.13549	0.01014	0.48127	0.00017	0.0008	0.00938	0.0089	0.000690827	0.00395543	0.0243654	0.0243842
0.1907	0.00286	0.71361	0.00053	0.00406	0.01223	0.01837	0.000690827	0.00448619	0.0243654	0.0245521
0.06807	0.00901	0.48127	0.00031	0.00119	0.01044	0.00991	0.000690827	0.00395543	0.0243654	0.0243842
0.14541	0.00901	1	0.0004	0.00197	0.0116	0.01663	0.000690827	0.00395543	0.0243654	0.0243842
0.14541	0.00486	1	0.00053	0.0032	0.00605	0.01663	0.000690827	0.00405577	0.0243654	0.0243842
0.10885	0.00901	0.72211	0.00015	0.0007	0.0158	0.01663	0.000690827	0.00395543	0.0243654	0.0243842
0.07998	0.01014	1	0.00046	0.00284	0.01288	0.01663	0.000690827	0.00395543	0.0243654	0.0243842
0.29349	0.00374	1	0.00046	0.00174	0.02235	0.02972	0.000690827	0.00395543	0.0258681	0.0305133
0.24562	0.00901	1	0.00053	0.0032	0.0158	0.01663	0.000690827	0.00405577	0.0243654	0.0243842
0.15588	0.01275	1	0.00046	0.00406	0.0158	0.01503	0.000690827	0.00448619	0.0243654	0.0243842
0.17851	0.0012	0.46107	0.00061	0.00223	0.01288	0.01503	0.000690827	0.00395543	0.0243654	0.0243842
0.11723	0.01014	0.48127	0.00035	0.00284	0.00605	0.0089	0.000690827	0.00395543	0.0243654	0.0243842
0.1907	0.00901	0.72211	0.00046	0.00197	0.02235	0.01357	0.000690827	0.00395543	0.0258681	0.0243842
0.29349	0.00088	0.71361	0.00061	0.00361	0.02706	0.0326	0.000690827	0.00424207	0.0286047	0.0330629
0.15588	0.00054	0.46107	0.00031	0.00174	0.01357	0.01663	0.000690827	0.00395543	0.0243654	0.0243842
0.23095	0.00427	1	0.0008	0.00511	0.02028	0.01357	0.0008	0.00527348	0.0250943	0.0243842
0.1669	0.00374	1	0.00046	0.00252	0.02345	0.02235	0.000690827	0.00395543	0.0264374	0.0252542
0.13549	0.01426	0.48127	0.0008	0.00572	0.01288	0.00991	0.0008	0.00579534	0.0243654	0.0243842
0.06807	0.0012	1	0.00023	0.00174	0.0089	0.0089	0.000690827	0.00395543	0.0243654	0.0243842
0.05766	0.00626	0.72211	0.00013	0.0008	0.01044	0.02028	0.000690827	0.00395543	0.0243654	0.0245521
0.2035	0.00901	1	0.0002	0.00153	0.0116	0.01503	0.000690827	0.00395543	0.0243654	0.0243842
0.13549	0.01014	0.72211	0.00053	0.0032	0.0116	0.02028	0.000690827	0.00405577	0.0243654	0.0245521
0.09352	0.00427	1	0.0002	0.00174	0.00842	0.0064	0.000690827	0.00395543	0.0243654	0.0243842
0.29349	0.00626	1	0.0007	0.0032	0.02128	0.0089	0.000761697	0.00405577	0.0250943	0.0243842
0.2035	0.01138	1	0.00061	0.00252	0.0258	0.02461	0.000690827	0.00395543	0.0277419	0.0262927
0.07998	0.008	1	0.0004	0.00252	0.0158	0.02235	0.000690827	0.00395543	0.0243654	0.0252542
0.10096	0.008	1	0.00015	0.00119	0.01044	0.0089	0.000690827	0.00395543	0.0243654	0.0243842
0.1907	0.00139	1	0.00031	0.00104	0.02706	0.01503	0.000690827	0.00395543	0.0286047	0.0243842
0.1669	0.00626	0.72211	0.00061	0.00284	0.0158	0.01101	0.000690827	0.00395543	0.0243654	0.0243842
0.17851	0.00187	0.71361	0.0008	0.00406	0.01044	0.01101	0.0008	0.00448619	0.0243654	0.0243842
0.17851	0.00374	1	0.0008	0.00511	0.01101	0.0089	0.0008	0.00527348	0.0243654	0.0243842
0.11723	0.00626	0.72211	0.0004	0.00284	0.01044	0.00798	0.000690827	0.00395543	0.0243654	0.0243842
0.07998	0.00427	1	0.00017	0.0004	0.01747	0.01357	0.000690827	0.00395543	0.0243654	0.0243842
0.17851	0.01773	0.48127	0.00035	0.0032	0.01044	0.0089	0.000690827	0.00405577	0.0243654	0.0243842
0.1669	0.00901	0.72211	0.00035	0.00153	0.01427	0.00715	0.000690827	0.00395543	0.0243654	0.0243842
0.17851	0.00427	1	0.00046	0.00252	0.01747	0.03572	0.000690827	0.00395543	0.0243654	0.0358275
0.07383	0.00374	0.72211	0.00013	0.0007	0.00482	0.00715	0.000690827	0.00395543	0.0243654	0.0243842
0.21691	0.00249	1	0.00061	0.00572	0.00798	0.01101	0.000690827	0.00579534	0.0243654	0.0243842
0.05298	0.01014	0.72211	0.00013	0.00091	0.01288	0.0089	0.000690827	0.00395543	0.0243654	0.0243842
0.14541	0.00626	1	0.00053	0.00284	0.01427	0.01101	0.000690827	0.00395543	0.0243654	0.0243842
0.1261	0.00249	1	0.00017	0.00046	0.01288	0.01663	0.000690827	0.00395543	0.0243654	0.0243842
0.1669	0.00327	1	0.00061	0.00252	0.00991	0.01503	0.000690827	0.00395543	0.0243654	0.0243842
0.1261	0.00374	1	0.00035	0.00197	0.01044	0.01663	0.000690827	0.00395543	0.0243654	0.0243842
0.2035	0.00187	1	0.0008	0.00455	0.0054	0.0089	0.0008	0.00485592	0.0243654	0.0243842
0.21691	0.01014	0.72211	0.00053	0.00223	0.02028	0.02028	0.000690827	0.00395543	0.0250943	0.0245521
0.1261	0.01591	0.296	0.00046	0.00284	0.00842	0.00991	0.000690827	0.00395543	0.0243654	0.0243842
0.14541	0.00286	1	0.0004	0.00284	0.01288	0.01503	0.000690827	0.00395543	0.0243654	0.0243842
0.1669	0.00374	1	0.00061	0.00361	0.00605	0.00715	0.000690827	0.00424207	0.0243654	0.0243842
0.08654	0.00427	1	0.00015	0.00061	0.02345	0.00715	0.000690827	0.00395543	0.0264374	0.0243842
0.10885	0.00187	1	0.00053	0.00406	0.01427	0.0089	0.000690827	0.00448619	0.0243654	0.0243842
0.21691	0.00187	1	0.00023	0.00135	0.01044	0.01663	0.000690827	0.00395543	0.0243654	0.0243842
0.08654	0.008	0.72211	0.00035	0.00119	0.00842	0.01663	0.000690827	0.00395543	0.0243654	0.0243842
0.1669	0.00216	0.71361	0.00026	0.00153	0.01101	0.00798	0.000690827	0.00395543	0.0243654	0.0243842
0.10096	0.00626	1	0.0002	0.00135	0.0158	0.01101	0.000690827	0.00395543	0.0243654	0.0243842
0.24562	0.00187	0.71361	0.00046	0.00284	0.02028	0.02028	0.000690827	0.00395543	0.0250943	0.0245521
0.23095	0.00427	1	0.0008	0.00572	0.01503	0.02706	0.0008	0.00579534	0.0243654	0.0282759
0.1669	0.00626	0.72211	0.00046	0.00361	0.0116	0.01503	0.000690827	0.00424207	0.0243654	0.0243842
0.08654	0.00216	1	0.0002	0.00061	0.00755	0.00991	0.000690827	0.00395543	0.0243654	0.0243842
0.1669	0.01591	0.48127	0.0004	0.0032	0.01044	0.0089	0.000690827	0.00405577	0.0243654	0.0243842
0.15588	0.00486	1	0.00035	0.00174	0.00938	0.02461	0.000690827	0.00395543	0.0243654	0.0262927
0.10885	0.00427	1	0.00023	0.00119	0.01357	0.01223	0.000690827	0.00395543	0.0243654	0.0243842
0.14541	0.00901	1	0.0004	0.00284	0.01044	0.01223	0.000690827	0.00395543	0.0243654	0.0243842
0.07383	0.00374	1	8e-05	0.00023	0.01427	0.02235	0.000690827	0.00395543	0.0243654	0.0252542
0.11723	0.01014	1	0.00053	0.00406	0.00938	0.00798	0.000690827	0.00448619	0.0243654	0.0243842
0.17851	0.00139	0.71361	0.0008	0.00511	0.01101	0.01663	0.0008	0.00527348	0.0243654	0.0243842
0.10885	0.00327	1	0.00031	0.00197	0.02706	0.02706	0.000690827	0.00395543	0.0286047	0.0282759
0.1261	0.00427	1	0.00031	0.00119	0.01101	0.02028	0.000690827	0.00395543	0.0243654	0.0245521
0.15588	0.00708	1	0.00035	0.00223	0.02345	0.02235	0.000690827	0.00395543	0.0264374	0.0252542
0.1907	0.00139	1	0.00031	0.00174	0.01288	0.01357	0.000690827	0.00395543	0.0243654	0.0243842
0.15588	0.00187	1	0.00031	0.00223	0.01357	0.0089	0.000690827	0.00395543	0.0243654	0.0243842
0.09352	0.00552	1	0.00017	0.0008	0.01747	0.01101	0.000690827	0.00395543	0.0243654	0.0243842
0.15588	0.008	0.72211	0.00046	0.00284	0.01044	0.0089	0.000690827	0.00395543	0.0243654	0.0243842
0.2035	0.00216	1	0.00061	0.00284	0.01357	0.01663	0.000690827	0.00395543	0.0243654	0.0243842
0.14541	0.01426	0.72211	0.0008	0.0064	0.02706	0.01503	0.0008	0.00640641	0.0286047	0.0243842
0.07383	0.0012	0.71361	0.00015	0.00119	0.00511	0.00715	0.000690827	0.00395543	0.0243654	0.0243842
0.23095	0.00286	1	0.00061	0.00223	0.01837	0.02028	0.000690827	0.00395543	0.0247119	0.0245521
0.11723	0.01426	0.72211	0.00046	0.00361	0.01044	0.00572	0.000690827	0.00424207	0.0243654	0.0243842
0.29349	0.01275	1	0.00053	0.00284	0.0116	0.01663	0.000690827	0.00395543	0.0243654	0.0243842
0.34726	0.00552	1	0.0004	0.00284	0.02972	0.02461	0.000690827	0.00395543	0.0306076	0.0262927
0.23095	0.00427	1	0.00061	0.00223	0.02345	0.01503	0.000690827	0.00395543	0.0264374	0.0243842
0.27688	0.00327	1	0.00046	0.00284	0.01427	0.02972	0.000690827	0.00395543	0.0243654	0.0305133
0.07383	0.01426	1	0.00046	0.00153	0.0258	0.01663	0.000690827	0.00395543	0.0277419	0.0243842
0.23095	0.00901	1	0.0007	0.00511	0.0158	0.01223	0.000761697	0.00527348	0.0243654	0.0243842
0.2035	0.00486	1	0.00061	0.0032	0.02235	0.02706	0.000690827	0.00405577	0.0258681	0.0282759
0.17851	0.01591	1	0.00061	0.00361	0.01288	0.01357	0.000690827	0.00424207	0.0243654	0.0243842
0.1669	0.01591	0.48127	0.00046	0.00361	0.0158	0.0089	0.000690827	0.00424207	0.0243654	0.0243842
0.14541	0.00626	1	0.00053	0.00197	0.0116	0.01503	0.000690827	0.00395543	0.0243654	0.0243842
0.13549	0.00552	1	0.0002	0.00091	0.00755	0.01663	0.000690827	0.00395543	0.0243654	0.0243842
0.14541	0.00626	0.72211	0.00053	0.00361	0.01288	0.01101	0.000690827	0.00424207	0.0243654	0.0243842
0.14541	0.00427	1	0.00053	0.00455	0.01663	0.02461	0.000690827	0.00485592	0.0243654	0.0262927
0.1261	0.00286	1	0.00061	0.00284	0.00991	0.02028	0.000690827	0.00395543	0.0243654	0.0245521
0.1907	0.00626	1	0.0004	0.00406	0.01357	0.01663	0.000690827	0.00448619	0.0243654	0.0243842
0.23095	0.00552	1	0.00053	0.00252	0.02028	0.01503	0.000690827	0.00395543	0.0250943	0.0243842
0.15588	0.00552	1	0.00023	0.00119	0.0326	0.02235	0.000690827	0.00395543	0.0330629	0.0252542
0.1907	0.00162	1	0.00023	0.00252	0.01101	0.01503	0.000690827	0.00395543	0.0243654	0.0243842
0.07998	0.00901	0.72211	0.00061	0.00361	0.0158	0.00511	0.000690827	0.00424207	0.0243654	0.0243842
0.1669	0.00486	1	0.00026	0.00174	0.01663	0.0089	0.000690827	0.00395543	0.0243654	0.0243842
0.27688	0.00286	1	0.00023	0.00135	0.01427	0.02028	0.000690827	0.00395543	0.0243654	0.0245521
0.1907	0.01773	0.48127	0.00046	0.00406	0.01288	0.01101	0.000690827	0.00448619	0.0243654	0.0243842
0.14541	0.01138	1	0.00061	0.00284	0.0116	0.0089	0.000690827	0.00395543	0.0243654	0.0243842
0.2035	0.00708	1	0.0008	0.00572	0.01044	0.00455	0.0008	0.00579534	0.0243654	0.0243842
0.21691	0.00286	1	0.0004	0.00135	0.01044	0.00991	0.000690827	0.00395543	0.0243654	0.0243842
0.13549	0.01138	1	0.00053	0.00284	0.00605	0.00715	0.000690827	0.00395543	0.0243654	0.0243842
0.1669	0.00216	1	0.00061	0.00223	0.0158	0.02028	0.000690827	0.00395543	0.0243654	0.0245521
0.05298	0.0012	1	0.00015	0.0008	0.01663	0.01101	0.000690827	0.00395543	0.0243654	0.0243842
0.15588	0.01591	1	0.00053	0.0032	0.01747	0.00572	0.000690827	0.00405577	0.0243654	0.0243842
0.08654	0.01138	1	0.00031	0.00135	0.02345	0.01101	0.000690827	0.00395543	0.0264374	0.0243842
0.15588	0.00286	1	0.00026	0.00252	0.00755	0.00511	0.000690827	0.00395543	0.0243654	0.0243842
0.1261	0.00374	1	0.00061	0.00284	0.00755	0.0064	0.000690827	0.00395543	0.0243654	0.0243842
0.06807	0.01972	0.48127	0.00061	0.00252	0.01747	0.00991	0.000690827	0.00395543	0.0243654	0.0243842
0.1261	0.00249	1	0.00061	0.00252	0.0116	0.00715	0.000690827	0.00395543	0.0243654	0.0243842
0.07383	0.008	0.72211	0.0004	0.00153	0.01288	0.0064	0.000690827	0.00395543	0.0243654	0.0243842
0.10885	0.00286	1	0.00023	0.00091	0.01427	0.01503	0.000690827	0.00395543	0.0243654	0.0243842
0.3665	0.008	1	0.00053	0.00284	0.01747	0.02461	0.000690827	0.00395543	0.0243654	0.0262927
0.17851	0.00162	0.71361	0.00026	0.00174	0.00842	0.01101	0.000690827	0.00395543	0.0243654	0.0243842
0.15588	0.00286	0.71361	0.00035	0.00174	0.0158	0.02461	0.000690827	0.00395543	0.0243654	0.0262927
0.17851	0.00901	1	0.00046	0.00223	0.0158	0.02972	0.000690827	0.00395543	0.0243654	0.0305133
0.17851	0.00626	0.72211	0.0008	0.0064	0.01044	0.00455	0.0008	0.00640641	0.0243654	0.0243842
0.06269	0.01014	1	0.00026	0.00153	0.00842	0.01101	0.000690827	0.00395543	0.0243654	0.0243842
0.15588	0.00374	1	0.00046	0.0032	0.0054	0.00715	0.000690827	0.00405577	0.0243654	0.0243842
0.07998	0.00552	1	0.00053	0.00223	0.01747	0.01101	0.000690827	0.00395543	0.0243654	0.0243842
0.17851	0.01014	0.72211	0.00061	0.00455	0.01101	0.00991	0.000690827	0.00485592	0.0243654	0.0243842
0.1261	0.008	0.72211	0.0004	0.00153	0.01747	0.00991	0.000690827	0.00395543	0.0243654	0.0243842
0.1261	0.01138	1	0.00026	0.00252	0.01427	0.01663	0.000690827	0.00395543	0.0243654	0.0243842
0.10096	0.00374	1	0.0008	0.00361	0.00842	0.0032	0.0008	0.00424207	0.0243654	0.0243842
0.06807	0.00187	1	0.00017	0.00119	0.00605	0.00991	0.000690827	0.00395543	0.0243654	0.0243842
0.1669	0.01138	0.48127	0.00046	0.0032	0.02461	0.01503	0.000690827	0.00405577	0.0271334	0.0243842
0.09352	0.00552	0.72211	0.00046	0.00197	0.00842	0.0089	0.000690827	0.00395543	0.0243654	0.0243842
0.14541	0.01014	0.72211	0.0004	0.00223	0.01427	0.01837	0.000690827	0.00395543	0.0243654	0.0245521
0.1669	0.00901	0.72211	0.00061	0.00406	0.00755	0.00511	0.000690827	0.00448619	0.0243654	0.0243842
0.21691	0.00286	1	0.00053	0.0032	0.01101	0.0089	0.000690827	0.00405577	0.0243654	0.0243842
0.23095	0.00708	1	0.00061	0.0032	0.02028	0.02028	0.000690827	0.00405577	0.0250943	0.0245521
0.1261	0.00708	0.72211	0.00046	0.00174	0.00842	0.01663	0.000690827	0.00395543	0.0243654	0.0243842
0.24562	0.008	1	0.00046	0.00284	0.01044	0.01503	0.000690827	0.00395543	0.0243654	0.0243842
0.26093	0.00486	0.72211	0.00061	0.00223	0.02345	0.02028	0.000690827	0.00395543	0.0264374	0.0245521
0.1669	0.00486	1	0.00026	0.00252	0.02235	0.00991	0.000690827	0.00395543	0.0258681	0.0243842
0.23095	0.00708	1	0.00053	0.00284	0.01288	0.01357	0.000690827	0.00395543	0.0243654	0.0243842
0.10096	0.00427	1	0.0002	0.00119	0.02972	0.02461	0.000690827	0.00395543	0.0306076	0.0262927
0.31076	0.00901	0.72211	0.00061	0.00223	0.03112	0.01357	0.000690827	0.00395543	0.0317227	0.0243842
0.09352	0.0012	1	0.00017	0.00104	0.01044	0.01357	0.000690827	0.00395543	0.0243654	0.0243842
0.10096	0.00552	1	0.00046	0.00174	0.02128	0.0326	0.000690827	0.00395543	0.0250943	0.0330629
0.2035	0.00187	1	0.00031	0.00153	0.01747	0.01663	0.000690827	0.00395543	0.0243654	0.0243842
0.09352	0.00374	1	0.00015	0.00091	0.01223	0.00406	0.000690827	0.00395543	0.0243654	0.0243842
0.17851	0.01275	0.72211	0.0004	0.00252	0.01747	0.01503	0.000690827	0.00395543	0.0243654	0.0243842
0.2035	0.01138	0.72211	0.00046	0.00361	0.0158	0.02235	0.000690827	0.00424207	0.0243654	0.0252542
0.17851	0.00626	1	0.0004	0.00223	0.01663	0.02235	0.000690827	0.00395543	0.0243654	0.0252542
0.2035	0.00327	0.71361	0.0007	0.00455	0.01357	0.02235	0.000761697	0.00485592	0.0243654	0.0252542
0.13549	0.01014	0.72211	0.00061	0.00284	0.01427	0.01223	0.000690827	0.00395543	0.0243654	0.0243842
0.23095	0.00626	1	0.0008	0.0032	0.02835	0.01837	0.0008	0.00405577	0.0296548	0.0245521
0.24562	0.00708	1	0.0007	0.00511	0.01747	0.02461	0.000761697	0.00527348	0.0243654	0.0262927
0.11723	0.00552	1	0.00013	0.0008	0.00938	0.01223	0.000690827	0.00395543	0.0243654	0.0243842
0.1669	0.00708	1	0.00061	0.0032	0.0158	0.01223	0.000690827	0.00405577	0.0243654	0.0243842
0.14541	0.00327	1	0.00017	0.00174	0.00605	0.01663	0.000690827	0.00395543	0.0243654	0.0243842
0.1907	0.00374	1	0.0004	0.00252	0.01288	0.01663	0.000690827	0.00395543	0.0243654	0.0243842
0.1261	0.00139	1	0.0002	0.00119	0.0116	0.00991	0.000690827	0.00395543	0.0243654	0.0243842
0.34726	0.008	1	0.0007	0.00284	0.0258	0.01357	0.000761697	0.00395543	0.0277419	0.0243842
0.13549	0.01138	1	0.0008	0.00252	0.02345	0.0089	0.0008	0.00395543	0.0264374	0.0243842
0.10885	0.00427	1	0.00053	0.00284	0.01837	0.01663	0.000690827	0.00395543	0.0247119	0.0243842
0.31076	0.00901	0.48127	0.00046	0.00284	0.02028	0.01503	0.000690827	0.00395543	0.0250943	0.0243842
0.1907	0.01773	1	0.00053	0.00406	0.0258	0.01663	0.000690827	0.00448619	0.0277419	0.0243842
0.17851	0.008	0.72211	0.00061	0.00406	0.01747	0.0089	0.000690827	0.00448619	0.0243654	0.0243842
0.11723	0.00552	1	0.00035	0.00223	0.0089	0.01223	0.000690827	0.00395543	0.0243654	0.0243842
0.07998	0.00626	0.72211	0.00031	0.00174	0.01288	0.02028	0.000690827	0.00395543	0.0243654	0.0245521
0.1907	0.00374	1	0.0004	0.00223	0.01503	0.0326	0.000690827	0.00395543	0.0243654	0.0330629
0.13549	0.00626	1	0.0004	0.00252	0.02461	0.02706	0.000690827	0.00395543	0.0271334	0.0282759
0.17851	0.00187	0.71361	0.0008	0.00284	0.02345	0.02461	0.0008	0.00395543	0.0264374	0.0262927
0.10096	0.00486	1	0.00046	0.00197	0.01837	0.01101	0.000690827	0.00395543	0.0247119	0.0243842
0.24562	0.00427	0.71361	0.0007	0.00406	0.0116	0.01357	0.000761697	0.00448619	0.0243654	0.0243842
