# Supplementary material for: Impaired renal transporter gene expression and uremic toxin excretion as aging hallmarks in cats with naturally occurring chronic kidney disease
Source: Aging (Albany NY). 2024 Dec 20;16(22):13588–607. doi: 10.18632/aging.206176 (PMC11723653; doi:10.18632/aging.206176)
Supplement: Supplementary Table 8 [file aging-16-206176-s010.xlsx]

## Sheet: Table S8
Supplementary Table 8a. Cortical tissue RNA-seq gene expressions of ABCC2, OAT1, OATP4C1, and OAT4 (counts per million).
Cat_ID	Cat_01	Cat_21	Cat_22	Cat_02	Cat_05	Cat_09	Cat_12	Cat_13	Cat_19	Cat_20	Cat_24	Cat_03	Cat_07	Cat_10	Cat_11	Cat_16	Cat_17	Cat_25	Cat_04	Cat_06	Cat_14	Cat_15	Cat_18	Cat_23
Group	Amyloidosis	Amyloidosis	Amyloidosis	CKD1/2	CKD1/2	CKD1/2	CKD1/2	CKD1/2	CKD1/2	CKD1/2	CKD1/2	CKD3/4	CKD3/4	CKD3/4	CKD3/4	CKD3/4	CKD3/4	CKD3/4	Control	Control	Control	Control	Control	Control	Mean	Median
ABCC2 (MRP2)	8.11545	4.48572	6.30077	5.0458	25.4001	3.64558	9.50449	5.36392	4.69015	9.34343	21.2502	7.17269	5.39275	5.91201	4.54186	6.33709	5.50637	5.21836	24.7968	11.9117	7.43492	10.0973	61.8994	11.7549	11	7
SLC22A6 (OAT1)	598.873	330.27	187.605	231.716	1221.97	1073.79	1215.8	167.975	407.502	728.26	427.928	299.795	159.477	40.1063	491.56	869.435	268.044	894.95	572.347	2501.73	793.772	973.053	824.173	1453.29	697	586
SLCO4C1 (OATP4C1)	22.5114	12.5288	7.33921	5.63738	60.1005	45.7062	38.5903	8.05248	27.6837	59.6526	69.3259	12.8741	25.6637	8.72992	19.3243	26.5607	12.1241	55.6239	40.0598	121.386	54.4677	61.2537	69.9828	68.7371	39	33
SLC22A11 (OAT4)	464.22	407.247	213.598	148.17	1161.76	833.969	950.367	302.042	1028.9	1308.01	1054.73	523.823	773.913	551.958	546.232	600.606	468.586	772.998	972.639	1784.96	1233.63	948.696	1402.38	1091.63	814	804
Supplementary Table 8b. Statistical analysis on cortical ABCC2, OAT1, OATP4C1, and OAT4 gene expressions between CKD1/2 vs control groups.
Gene Symbol	logFC	logCPM	F	PValue	FDR	ensembl_gene_id	entrezgene_id
ABCC2	-0.870008	3.55517	3.55418	0.0744843	0.343754	ENSFCAG00000014380	101085924
SLC22A6	-0.807718	9.50505	2.02953	0.170178	0.465934	ENSFCAG00000005247	101094048
SLCO4C1	-0.781329	5.37537	2.52289	0.128392	0.416892	ENSFCAG00000025960	101090738
SLC22A11	-0.527753	9.75061	2.35431	0.141105	0.430174	ENSFCAG00000001994	101093962
Supplementary Table 8c. Statistical analysis on medullar ABCC2, OAT1, OATP4C1, and OAT4 gene expressions between CKD3/4 vs control groups.
Gene Symbol	logFC	logCPM	F	PValue	FDR	ensembl_gene_id	entrezgene_id	description
ABCC2	-1.64368	3.55517	10.9202	0.00365373	0.0318363	ENSFCAG00000014380	101085924
SLC22A6	-1.3976	9.50505	5.6197	0.0282717	0.0945778	ENSFCAG00000005247	101094048
SLCO4C1	-1.57538	5.37537	9.28087	0.00653675	0.0423181	ENSFCAG00000025960	101090738
SLC22A11	-1.0023	9.75061	7.94304	0.0108361	0.0546068	ENSFCAG00000001994	101093962
Supplementary Table 8d. Cortical tissue gene expression (CPM) in OLD and YNG groups of control cats.
	YNG		OLD
Gene symbol	Mean	Sample no	Mean	Sample no	FC (OLD/YNG)
OAT1	1978	2	791	4	0.4
OAT4	1438	2	1139	4	0.8
OATP4C1	95	2	56	4	0.6
ABCC2	12	2	26	4	2.2
