# Supplementary material for: Impaired renal transporter gene expression and uremic toxin excretion as aging hallmarks in cats with naturally occurring chronic kidney disease
Source: Aging (Albany NY). 2024 Dec 20;16(22):13588–607. doi: 10.18632/aging.206176 (PMC11723653; doi:10.18632/aging.206176)
Supplement: Supplementary Table 9 [file aging-16-206176-s011.xlsx]

## Sheet: Table S9
Supplementary Table 9a. Medullar tissue RNA-seq gene expressions of ABCC2, OAT1, OATP4C1, and OAT4 (counts per million).
Cat_ID	Cat_01	Cat_18	Cat_19	Cat_05	Cat_08	Cat_09	Cat_12	Cat_13	Cat_17	Cat_21	Cat_03	Cat_07	Cat_10	Cat_11	Cat_22	Cat_04	Cat_06	Cat_14	Cat_15	Cat_16	Cat_20
Group	Amyloidosis	Amyloidosis	Amyloidosis	CKD1/2	CKD1/2	CKD1/2	CKD1/2	CKD1/2	CKD1/2	CKD1/2	CKD3/4	CKD3/4	CKD3/4	CKD3/4	CKD3/4	Control	Control	Control	Control	Control	Control	Mean	Median
ABCC2 (MRP2)	5.93549	5.32928	5.88491	17.5157	4.60721	5.78251	9.85482	9.16811	7.16079	7.36101	8.85769	5.79035	5.50803	6.13952	3.72065	16.7952	26.7911	11.7533	17.9837	16.9488	6.05878	10	7
SLC22A6 (OAT1)	2.72506	350.835	0.329081	1.69551	4.3546	73.4792	3.60206	1.10545	2.19942	0.671293	16.0053	39.541	20.5326	0.645815	82.8759	103.322	1238.99	426.418	521.014	67.1399	1.88367	141	16
SLCO4C1 (OATP4C1)	5.35429	12.7474	3.34222	11.0981	4.03464	27.5696	10.9291	3.91035	26.9714	10.9126	3.2003	38.9531	20.2937	4.40585	11.4716	29.7441	139.398	68.381	100.915	24.8664	14.4602	27	13
SLC22A11 (OAT4)	5.21591	412.727	10.3542	36.7822	36.6038	470.895	15.3522	21.1145	385.84	33.305	35.4888	872.769	806.633	106.546	288.003	429.845	1625.51	1360.98	1677.74	267.126	17.7901	425	267
Supplementary Table 9b. Statistical analysis on medullar ABCC2, OAT1, OATP4C1, and OAT4 gene expressions between CKD1/2 vs control groups.
GeneSymbol	logFC	logCPM	F	PValue	FDR	ensembl_gene_id	entrezgene_id
ABCC2	-0.87342	3.38217	6.54441	0.0206243	0.124448	ENSFCAG00000014380	101085924
SLC22A6	-5.5686	7.169	15.4355	0.0011256	0.0439461	ENSFCAG00000005247	101094048
SLCO4C1	-2.32463	4.92992	12.5723	0.00256222	0.055733	ENSFCAG00000025960	101090738
SLC22A11	-3.24486	8.86959	9.42947	0.00707229	0.0756917	ENSFCAG00000001994	101093962
Supplementary Table 9c. Statistical analysis on medullar ABCC2, OAT1, OATP4C1, and OAT4 gene expressions between CKD3/4 vs control groups.
GeneSymbol	logFC	logCPM	F	PValue	FDR	ensembl_gene_id	entrezgene_id
ABCC2	-1.43982	3.38217	14.0987	0.00163518	0.0341936	ENSFCAG00000014380	101085924
SLC22A6	-2.8514	7.169	3.96258	0.0632435	0.203486	ENSFCAG00000005247	101094048
SLCO4C1	-1.86513	4.92992	6.55065	0.0205729	0.111851	ENSFCAG00000025960	101090738
SLC22A11	-0.893554	8.86959	0.731839	0.404464	0.590211	ENSFCAG00000001994	101093962
Supplementary Table 9d. Medullar tissue gene expression (CPM) in OLD and YNG groups of control cats.
	YNG		OLD
Gene symbol	Mean	Sample no	Mean	Sample no	FC (OLD/YNG)
OAT1	620	2	279	4	0.5
OAT4	822	2	934	4	1.1
OATP4C1	77	2	56	4	0.7
ABCC2	16	2	16	4	1
